# Supplementary material for: Channel selection method for hyperspectral atmospheric infrared sounder using AIRS data based on layering
Source: Copernicus journal article supplement (doi:10.5194/amt-2019-183), 2019-07-29
Supplement: Supplementary file [file amt-2019-183-AC2-supplement.pdf]

1 Channel selection method for hyperspectral  
2 atmospheric infrared sounder using AIRS data  
3 based on layering

4 Shujie Chang<sup>1, 2, 3</sup>, Zheng Sheng<sup>1, 2</sup>, Huadong Du<sup>1, 2</sup>, Wei Ge<sup>1, 2</sup> and  
5 Wei Zhang<sup>1, 2</sup>

6 <sup>1</sup> College of Meteorology and Oceanography, National University of  
7 Defense Technology, Nanjing, China

8 <sup>2</sup> Collaborative Innovation Center on Forecast and Evaluation of  
9 Meteorological Disasters, Nanjing University of Information  
10 Science and Technology, Nanjing, China

11 <sup>3</sup> South China Sea Institute for Marine Meteorology, Guangdong  
12 Ocean University, Zhanjiang, China

13  
14 **Correspondence:** Zheng Sheng (19994035@sina.com)

15  
16 **Abstract.** Because a satellite channel's ability to resolve  
17 hyperspectral data varies with height, an improved channel selection  
18 method is proposed based on information content. An effective  
19 channel selection scheme for a hyperspectral atmospheric infrared  
20 sounder using AIRS data based on layering is proposed. The results  
21 are as follows: (1) Using the improved method, the atmospheric  
22 retrievable index is more stable, the value reaching 0.54. The

distribution of the temperature weight function is more continuous,  
more closely approximating that of the actual atmosphere; (2)  
Statistical inversion comparison experiments show that the accuracy  
of the retrieval temperature, using the improved channel selection  
method in this paper, is consistent with that of 1Dvar channel  
selection. In the near space layer especially, from 10 hPa to 0.02 hPa,  
the accuracy of the retrieval temperature of our improved channel  
selection method is evidently improved by about 1 K. In general, the  
accuracy of the retrieval temperature of ICS (Improved Channel  
Selection) is improved. Especially, from 100 hPa to 0.01 hPa, the  
accuracy of ICS can be improved by more than 11 %; (3) Statistical  
inversion comparison experiments in four typical regions indicate  
that ICS in this paper is significantly better than NCS (NWP  
Channel Selection) and PCS (Primary Channel Selection) in  
different regions and shows latitudinal variations. Especially, from  
100 hPa to 0.01 hPa, the accuracy of ICS can be improved by 7% to  
13%, which means the ICS method selected in this paper is feasible  
and shows great promise for applications.

## **1 Introduction**

Since the successful launch of the first meteorological satellite,  
TIROS in the 1960s, satellite detection technology has developed

rapidly. Meteorological satellites observe Earth's atmosphere from space and are able to record data from regions which are otherwise difficult to observe. Satellite data greatly enrich the content and range of meteorological observations, and consequently, atmospheric exploration technology and meteorological observations have taken us to a new stage in our understanding of weather systems and related phenomena (Fang, 2014). From the perspective of vertical atmospheric detection, satellite instruments are developing rapidly. In their infancy, the traditional infrared detection instruments for detecting atmospheric temperature and moisture profiles, such as TOVS (Smith et al., 1991) or HIRS in ATOVS (Chahine, 1972; Li et al., 2000; Liu, 2007), usually employed filter spectrometry. Even though such instruments have played an important role in improving weather prediction, it is difficult to continue to build upon improvements in terms of detection accuracy and vertical resolution due to the limitation of low spectral resolution. By using this kind of filter-based spectroscopic detection instrument, therefore, it is difficult to meet today's needs in numerical weather prediction (Eyre et al., 1993). To meet this challenge, a series of plans for the creation of high-spectral resolution atmospheric detection instruments has been executed in the United States and in Europe in recent years: One example is the AIRS (Atmospheric InfraRed Sounder) on the

Earth Observation System, “Aqua”, launched on May 4, 2002 from the United States. AIRS has 2378 spectral channels with subpoint at 13 km and a detection height from the ground of up to 65 km (Aumann et al., 2003; Hoffmann and Alexander, 2009; Gong et al., 2011). The United States and Europe, in 2010, also installed the CRIS (Cross-track Infrared Sounder) and the IASI (Inter-Attractive Atmospheric Sounding Interferometer) on polar-orbiting satellites.

China also attaches great importance to the development of such advanced detection technologies. In the early 1990s, the National Satellite Meteorological Center began to investigate the principles and techniques of hyperspectral resolution atmospheric detection. China’s development of interferometric atmospheric vertical detectors eventually led to the launch of Fengyun No. 3, on May 27, 2008, and Fengyun No. 4 on December 11, 2016, both of which were equipped with infrared atmospheric detectors. How best to use the hyperspectral resolution detection data obtained from these instruments, to obtain reliable atmospheric temperature and humidity profiles, is an active area of intense study in atmospheric inversion theory.

Due to technical limitations, only a limited number of channels could at first be built into the general satellite detection instrument. In this case, channel selection generally involved controlling the

channel weight function by utilizing the spectral response characteristics of the channel (such as the center frequency, bandwidth). With the development of detection technology, increasing numbers of hyperspectral detectors were carried on meteorological satellites. Due to the large number of channels and data supported by such instruments today (such as AIRS with 2378 channels and IASI with 8461 channels), it has proven extremely cumbersome to store, transmit, and process such data. Moreover, there is a close correlation between each channel, causing an ill-posedness of the inversion, potentially compromising accuracy of the retrieval product based on hyperspectral resolution data.

However, hyperspectral detectors have many channels and provide real-time mode prediction systems with vast quantities of data, which can significantly improve prediction accuracy. But, if all the channels are used to retrieve data, the retrieval time considerably increases. Even more problematic are the glut of information produced, and the unsuitability of the calculations for real-time forecasting. Concurrently, the computer processing power must be large enough to meet the demands of all the channels simultaneously within the forecast time. It is important to select a group of channels that can provide as much information as possible from the thousands of channels' observations to improve the calculation efficiency and

retrieval quality.

Many researchers have studied the channel selection algorithm. Menke (1984) first chose channels using a data precision matrix method. Aires et al. (1999) made the selection using the Jacobian matrix, which has been widely used since then (Aires et al., 2002; Rabier et al., 2010). Rodgers (2000) indicated that there are two useful quantities in measuring the information provided by the observation data: Shannon information content and degrees of freedom. The concept of information capacity then became widely used in satellite channel selection. In 2007, Xu (2007) compared the Shannon information content with the relative entropy, analyzing the information loss and information redundancy. In 2008, Du et al. (2008) introduced the concept of the atmospheric retrievable index (ARI) as a criterion for channel selection, and in 2010, Wakita et al. (2010) produced a scheme for calculating the information content of the various atmospheric parameters in remote sensing using Bayesian estimation theory. Kuai et al. (2010) analyzed both the Shannon information content and degrees of freedom in channel selection when retrieving CO<sub>2</sub> concentrations using thermal infrared remote sensing and indicated that 40 channels could contain 75% of the information from the total of 1016 channels. Cyril et al. (2003) proposed the optimal sensitivity profile method based on the

sensitivity of different atmospheric components. Lupu et al. (2012) used degrees of freedom for signals (DFS) to estimate the amount of information contained in observations in the context of observing system experiments. In addition, the singular value decomposition method has also been widely used for channel selection (Prunet et al., 2010; Zhang et al., 2011; Wang et al., 2014). In 2017, Chang et al. (2017) selected a new set of Infrared Atmospheric Sounding Interferometer (IASI) channels using the channel score index (CSI). Richardson et al. (2018) selected 75 from 853 channels using information content analysis to retrieve the cloud optical depth, cloud properties, and position.

Today's main methods for channel selection (such as the data precision matrix method (Menke, 1984), singular value decomposition method (Prunet et al., 2010; Zhang et al., 2011; Wang et al., 2014), and the Jacobi method (Aires et al., 1999; Rabier et al., 2010) use only the weight function to study appropriate numerical methods, the use of which allows sensitive channels to be selected.

The above-mentioned studies also take into account the sensitivity of each channel to atmospheric parameters during channel selection, while ignoring factors that impact retrieval results. The accuracy of retrieval results depends not only on the channel weight function but also on the channel noise, background field, and the retrieval

algorithm.

Currently, information content is often employed in channel selection. During retrieval, this method delivers the largest amount of information for the selected channel combination (Rodgers, 1996; Du et al., 2008; He et al., 2012; Richardson et al., 2018). Although this method has made great breakthroughs in both theory and practice, however, it does not take the sensitivity of different channels at different heights into consideration. This paper uses the atmospheric retrievable index (ARI) as the index, which is based on information content (Du et al., 2008; Richardson et al. 2018).

Channel selection is made at different heights, and an effective channel selection scheme is proposed which fully considers various factors, including the influence of different channels on the retrieval results at different heights. This ensures the best accuracy of the retrieval product when using the selected channel. In addition, statistical inversion comparison experiments are used to verify the effectiveness of the method.

## **2 Channel selection indicator, scheme and method**

### **2.1 Channel selection indicator**

According to the concept of information content, the information content contained in a selected channel of a hyperspectral instrument



can be described as H (Rodgers, 1996; Rabier et al., 2010). The final expression of H is:

$$H = -\frac{1}{2} \ln |\hat{S} S_a^{-1}|$$

$$= -\frac{1}{2} \ln |(S_a - S_a K^T (K S_a K^T + S_\varepsilon)^{-1} K S_a) S_a^{-1}|, \quad (1)$$

where  $S_a$  is the error covariance matrix of the background or the estimated value of atmospheric profile,  $\hat{S}$  represents the observation error covariance matrix of each hyperspectral detector channel,  $\hat{S} = (S_a - S_a K^T (K S_a K^T + S_\varepsilon)^{-1} K S_a)$  denotes the covariance matrix after retrieval by hyperspectral data, K is the weight function matrix, which comes from the selected channel in the hyperspectral data with respect to a specific atmospheric profile parameter.

In order to describe the accuracy of the retrieval results visually and quantitatively, the atmospheric retrievable index (ARI), p, (Du et al., 2008) is defined as follows:

$$p = 1 - \exp\left(\frac{1}{2n} \ln |\hat{S} S_a^{-1}|\right), \quad (2)$$

where  $S_a$  is the error covariance matrix of the background or the estimated value of the atmospheric profile, and  $\hat{S}$  represents the

observation error covariance matrix of each hyperspectral detector channel. Assuming that before and after retrieval, the ratio of the root mean square error of each element in the atmospheric state vector is  $1-p$ , then  $|\hat{S}S_a^{-1}| = (1-p)^{2n}$  is derived. By inverting the equation, the ARI that is  $p$  can be obtained in Eq. (2), which indicates the relative portion of the error that is eliminated by retrieval. In fact, before and after retrieval, the ratio of the root mean square error of each element cannot be  $1-p$ . Therefore,  $p$  defined by Eq. (1) is actually an overall evaluation of the retrieval result.

## 2.2 Channel selection scheme

The principle of channel selection is to find the optimum channel combination after numbering the channels. This combination will make the information content,  $H$ , or the ARI defined in this paper as large as possible, in order to maintain the highest possible accuracy in the retrieval results.

Let there be  $M$  layers in the vertical direction of the atmosphere and  $N$  satellite channels. Selecting  $n$  from  $N$  channels, there will be  $C_N^n$  combinations in each layer, leading  $C_N^n$  calculations to get  $C_N^n$  kinds of  $p$  results. Furthermore, under the maximum one  $p$ -value, the corresponding channel combination is used as the optimum channel combination; therefore, the entire atmosphere must be calculated

$M \cdot C_N^n$  times. However, the calculation  $M \cdot C_N^n$  times will be particularly large, which makes this approach impractical in calculating  $p$  for all possible combinations. Therefore, it is necessary to design an effective calculation scheme, and such a scheme, i.e., a channel selection method, using iteration is proposed, called the “sequential absorption method”. The method’s main function is to select (“absorb”) channels one by one, taking the channel with the maximum value of  $p$ . Through  $n$  iterations,  $n$  channels can be selected as the final channel combination. The steps are as follows:

(1) The expression of information content in a single channel:

First, we use only one channel for retrieval. A row vector,  $k$ , in the weight function matrix,  $K$ , is a weight function corresponding to the channel. A diagonal element,  $s_\varepsilon \frac{\partial^2 \Omega}{\partial v^2}$ , in the  $S_\varepsilon$  matrix is the error variance in the channel. After observation in this channel, the error covariance matrix is:

$$\hat{S} = S_a - S_a k^T (s_\varepsilon + k S_a k^T)^{-1} k S_a. \quad (3)$$

It should be noted that  $(s_\varepsilon + k S_a k^T)$  is a single value in Eq. (3), so Eq. (3) can be converted to:

$$\hat{S} = \left( I - \frac{S_a k^T k}{(s_\varepsilon + k S_a k^T)} \right) S_a = \left( I - \frac{(k S_a)^T k}{(s_\varepsilon + k (k S_a)^T)} \right) S_a. \quad (4)$$

Substituting Eq. (4) into Eq. (2) gives:

$$p = 1 - \exp\left(\frac{1}{2n} \ln\left(\left| I - \frac{(k S_a)^T k}{(s_\varepsilon + k (k S_a)^T)} \right|\right)\right). \quad (5)$$

(2) Simplification of Eq. (5) p matrix:

Since  $S_a$  is a positive definite symmetric matrix, it can be decomposed into  $S_a = (S_a^{1/2})^T (S_a^{1/2})$  and  $S_\varepsilon = (S_\varepsilon^{1/2})^T (S_\varepsilon^{1/2})$ .

$$\text{Define } R = S_\varepsilon^{1/2} K S_a^{1/2}. \quad (6)$$

The matrix R can then be regarded as a weight function matrix, normalized by the observed error and pre-observation error. A row vector of R,  $r = s_\varepsilon^{-1/2} k S_a^{1/2}$ , represents the normalized weight function matrix of a single channel. Substituting r into Eq. (5) gives:

$$p = 1 - \exp\left(\frac{1}{2n} \ln \left( \left| I - \frac{r r^T}{1 + r^T r} \right| \right)\right). \quad (7)$$

For arbitrary row vectors, a and b, using the matrix property  $\det(I + a^T b) = 1 + b a^T$ , the new expression for p is:

$$\begin{aligned} p &= 1 - \exp\left(\frac{1}{2n} \ln \left( 1 - \frac{r^T r}{1 + r^T r} \right)\right) \\ &= 1 - \exp\left(\frac{1}{2n} \ln \left( \frac{1}{1 + r^T r} \right)\right) \\ &= 1 - \exp\left(-\frac{1}{2n} \ln(1 + r^T r)\right). \end{aligned} \quad (8)$$

(3) Iteration in a single layer:

First, the iteration in a single layer requires the calculation of  $R$ .

According to  $S_a$ ,  $S_\varepsilon$ ,  $K$  and Eq. (6),  $R$ , which is  $r$  corresponding to all the selected channels, can be calculated. Second, using Eq. (8),  $p$  of each candidate channel can be calculated. Moreover, the channel corresponding to maximum  $p$  is the selected channel for this iteration. After a channel has been selected, according to Eq. (3) we can use  $\hat{S}$  to get  $S_a$  for the next iteration. Finally, channels which are not selected during this iteration are used as the candidate channels for the next iteration.

When selecting  $n$  from  $N$  channels, it is necessary to calculate  $(N-n/2)n \approx Nn$   $p$  values, which is much smaller than  $C_N^n$ . Of course, the combination selected by this method is not completely equivalent to the channel combination corresponding to the optimum value of  $C_N^n$   $p$ , but it still satisfies the optimum value in a certain sense. In addition to its high computational efficiency by using this method, another advantage is that all channels can be recorded in the order in which they are selected. In the actual application, if  $n'$  channels are needed, and  $n' < n$ , we will not need to select the channel again, but record the selected channel only.

(4) Iteration for different altitudes:

Because satellite channel sensitivity varies with height, repeating

the iterative process of step (3), selects the optimum channels at different heights. Assuming there are  $M$  layers in the atmosphere and selecting  $n$  from  $N$  channels, it is necessary to calculate  $M \cdot (N - n/2)n \approx M \cdot Nn$   $p$  values, a much smaller number than  $M \cdot C_N^n$ .

### 2.3 Statistical inversion method

The inversion method of the atmospheric temperature profile can be summarized in two categories: statistical inversion and physical inversion. Statistical inversion is essentially a linear regression model which uses a large number of satellite measurements and atmospheric parameters to match samples and calculate their correlation coefficient. Then, based on the correlation coefficient, the required parameters of the independent measurements obtained by the satellite are retrieved. Because the method does not directly solve the radiation transfer equation, it has the advantages of fast calculation speed. In addition, the solution is stable, which makes it one of the highest precision methods (Chedin et al., 1985). Therefore, the statistical inversion method will be used for our channel selection experiment and a regression equation will be established.

According to an empirical orthogonal function, the atmospheric temperature (or humidity),  $T$ , and the brightness temperature,  $T_b$ , are expanded thus:

$$T = T^* \cdot A, \quad (9)$$

$$T_b = T_b^* \cdot A, \quad (10)$$

where  $T^*$  and  $T_b^*$  are the eigenvectors of the covariance matrix of temperature (or humidity) and brightness temperature, respectively. A and B stand for the corresponding expansion coefficient vectors of temperature (humidity) and brightness temperature.

Using the least squares method and the orthogonal property, the coefficient conversion matrix, V, is introduced:

$$A = V \cdot B, \quad (11)$$

$$\text{where } V = AB^T(BB^T)^{-1}. \quad (12)$$

Using the orthogonality, we get:

$$B = (T_b^*)^T T_b, \quad (13)$$

$$A = (T^*)^T T. \quad (14)$$

For convenience, the anomalies of the state vector (atmospheric temperature),  $T$ , and the observation vector (brightness temperature),  $T_b$ , are taken:

$$\hat{T} = \bar{T} + \hat{T}' = \bar{T} + GT_b' = \bar{T} + G(T_b - \bar{T}_b), \quad (15)$$

where  $\bar{T}$  and  $\bar{T}_b$  are the corresponding average values of the elements, respectively.  $T'$  and  $T_b'$  represent the corresponding anomalies of the elements, respectively.

Assuming there are  $k$  sets of observations, a sample anomaly matrix with  $k$  vectors can be constructed:

$$T' = (t_1', t_2', \dots, t_k'), \quad (16)$$

$$T_b' = (t_{b1}', t_{b2}', \dots, t_{bk}'). \quad (17)$$

Define the inversion error matrix as:

$$\delta = \bar{T} - \hat{T} = \hat{T}' - T'. \quad (18)$$

The retrieval error covariance matrix is:



$$\begin{aligned}
S_{\delta} &= \frac{1}{k-n-1} \delta \delta^T \\
&= \frac{1}{k-n-1} (T' - GT_b')(T' - GT_b')^T \\
&= \frac{k-1}{k-n-1} (S_e - G^T S_{xy} - S_{xy} G^T + GS_y G^T),
\end{aligned} \tag{19}$$

where

$$\begin{aligned}
S_e &= \frac{1}{k-1} T' T'^T, \\
S_y &= \frac{1}{k-1} T_b' T_b'^T, \\
S_{xy} &= \frac{1}{k-1} T' T_b'^T.
\end{aligned} \tag{20}$$

$S_e$  stands for the sample covariance matrix of  $T$ ,  $S_y$  denotes the sample covariance matrix of  $T_b$ , and  $S_{xy}$  represents the covariance matrix of  $T$  and  $T_b$ . The elements on the diagonal of the error covariance matrix,  $S_{\delta}$ , represent the retrieval error variance of  $T$ . The matrix  $G$  that minimizes the overall error variance is the least squares coefficient matrix of the regression equation (15), which meets the criteria:

$$\delta^2 = \text{tr}(S_{\delta}) = \min. \tag{21}$$

Equation (21) takes a derivative with respect to  $G$ ,  $\frac{\partial}{\partial G} \text{tr}(S_\delta) =$   
 $0 = (-2S_{xy} + 2GS_y)$ , which means that:

$$G = S_{xy}S_y^{-1}. \quad (22)$$

Substituting Eq. (22) into Eq. (15) finally gives the least squares  
solution as:

$$\hat{T} = \bar{T} + S_{xy}S_y^{-1}(T_b - \bar{T}_b). \quad (23)$$

It should be noted that the least squares solution obtained here  
aims to minimize the sum of the error variance for each element in  
the atmospheric state vector after retrieval of observations has been  
completed several times. At present, statistical multiple regression is  
widely used in the retrieval of atmospheric profiles based on  
atmospheric remote sensing data. As long as there are enough data,  
 $S_{xy}$  and  $S_y$  can be determined.

### **3. Channel selection experiment**

#### **3.1 Data and model**

The Atmospheric Infrared Sounder (AIRS) instrument suite is  
designed to measure the Earth's atmospheric water vapor and

temperature profiles on a global scale. AIRS is a continuously operating cross-track scanning sounder, consisting of a telescope that feeds an echelle spectrometer. The AIRS infrared spectrometer acquires 2378 spectral samples at a resolution  $\lambda/\Delta\lambda$ , ranging from 1086 to 1570, in three bands: 3.74  $\mu\text{m}$  to 4.61  $\mu\text{m}$ , 6.20  $\mu\text{m}$  to 8.22  $\mu\text{m}$ , and 8.8  $\mu\text{m}$  to 15.4  $\mu\text{m}$ . The spatial footprint of the infrared channels is  $1.1^\circ$  in diameter, which corresponds to about  $15 \times 15$  km at the nadir. The spectral range includes 4.2  $\mu\text{m}$  for important temperature detection, 15  $\mu\text{m}$  for  $\text{CO}_2$ , 6.3  $\mu\text{m}$  for water vapor, and 9.6  $\mu\text{m}$  for ozone absorption bands. The absolute accuracy of the measured radiation is better than 0.2 K. Moreover, global atmospheric profiles can be detected every day, and the four imaging channels of visible/near infrared are always filled. Due to radiometer noise and faults, there are currently only 2047 effective channels. However, compared with previous infrared detectors, AIRS boasts a significant improvement in both the number of channels and spectral resolution (Aumann, 1994; Huang et al., 2005; Li et al., 2005).

AIRS provides real-time mode prediction systems with vast quantities of data, which greatly improves prediction accuracy. However, if all the channels are used to retrieve data, the retrieval time becomes greatly extended. Even more problematic are the huge amounts of information and calculations not being suitable for

412 real-time forecasting.

413     The root mean square error of an AIRS infrared channel is shown  
414 in Fig. 1, with black spots, indicating that not all the instrument  
415 channels possess a measurement error of less than 0.2 K. Among  
416 them, some extremely large measurement errors reduce the accuracy  
417 of prediction to some extent. Moreover, not all channels possess the  
418 same measurement error. At present, more than 300 channels have  
419 not been used because their errors exceed 1 K. If data from these  
420 channels were to be used for retrieval, the accuracy of the retrieval  
421 could be reduced. Therefore, it is necessary to select a group of  
422 channels to improve the calculation efficiency and retrieval quality.  
423 In this paper we study channel selection for temperature profile  
424 retrieval by AIRS.

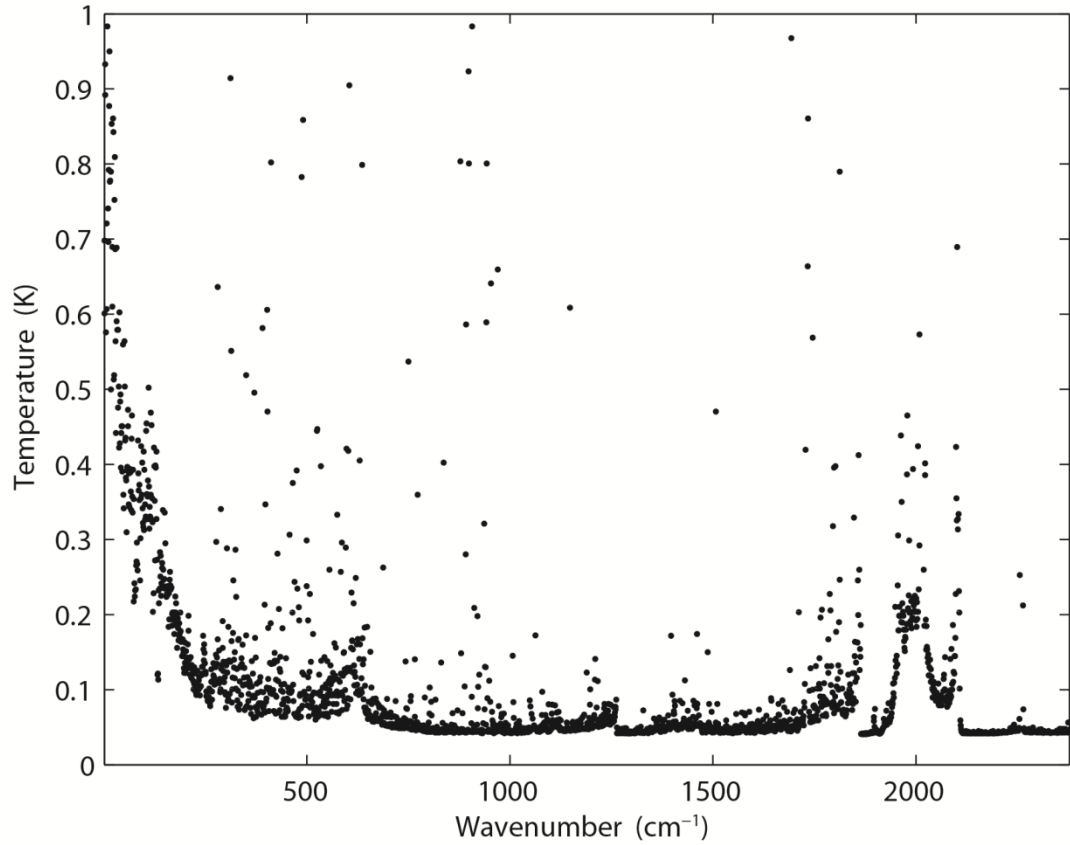

**Figure 1.** Root mean square error of AIRS infrared channel (black spots).

For the radiative transfer model and its weight function matrix,  $K$ , the RTTOV v12 fast radiative transfer model is used (Saunders et al., 2018). The model allows rapid simulations (1 ms for 40 channel ATOVS on a desktop PC) of radiances for satellite visible, infrared, or microwave nadir scanning radiometers given atmospheric profiles of temperature and variable gas concentration, and cloud and surface properties. The only mandatory gas included as a variable for RTTOV v12 is water vapor. Optionally, ozone, carbon dioxide, nitrous oxide, methane, carbon monoxide, and sulfur dioxide can be

included, with all other constituents assumed to be constant. RTTOV v12 can accept input profiles on any defined set of pressure levels. The majority of RTTOV v12 coefficient files are based on the 54 levels (see Table A1 in Appendix A), ranking from 1050 hPa to 0.01 hPa, though coefficients for some hyperspectral sounders are also available on 101 levels.

The weight function matrix,  $K$  (Jacobian matrix), in this paper is the weight function matrix of the atmospheric characteristics. In order to correspond to the selected profiles, the atmosphere is divided into 137 layers, each of which contains corresponding atmospheric characteristics, such as temperature, pressure, and the humidity distribution. Each element in the weight function matrix can be written as  $\partial y_i / \partial x_j$ . The subscript  $i$  is used to identify the satellite channel, and the subscript  $j$  is used to identify the atmospheric characteristics. Therefore,  $\partial y_i / \partial x_j$  indicates the variation in radiation brightness temperature in a given satellite channel, when a given atmospheric characteristic in a given layer changes. We are thus able to establish which layer of the satellite channel is particularly sensitive to which atmospheric characteristic (temperature, various gas contents) in the vertical atmosphere. The RTTOV\_K (the K mode), is used to calculate the matrix  $H(X_0)$  for a given atmospheric profile characteristic.

### 3.2 Channel selection comparison experiment and results

In order to verify the effectiveness of the method, three sets of comparison experiments were conducted. First, 324 channels used by the EUMETSAT Satellite Application Facility on Numerical Weather Prediction (NWP SAF) were selected. NCS is short for NWP channel selection in this paper. The products were released by the NWPSAF 1DVar (one-dimensional variational analysis) scheme, in accordance with the requirements of the NWPSAF. Second, 324 channels were selected using the information capacity method. This method was adopted by Du et al. (2008) without the consideration of layering. PCS is short for primary channel selection in this paper.

Third,  $324 \times M$  channels were selected using the information capacity method for the  $M$  layer atmosphere. ICS is short for improved channel selection in this paper. In order to verify the retrieval effectiveness after channel selection, statistical inversion comparison experiments were performed using 5000 temperature profiles provided by the ECMWF dataset, which will be introduced in Sect. 4.

The observation error covariance matrix,  $S_{\varepsilon}$ , in the experiment is provided by NWP SAF 1Dvar. In general, it can be converted to a diagonal matrix, the elements of which are the observation error

standard deviation of each hyperspectral detector channel, which is the square of the root mean square error for each channel. The root mean square error of an AIRS infrared channel is shown in Fig. 1. The error covariance matrix of the background,  $S_a$ , is calculated using 5000 samples of the IFS-137 data provided by the ECMWF dataset. The last access date is April 26th, 2019 (download address: <https://www.nwpsaf.eu/site/update-137-level-nwp-profile-dataset/>, 2019). The covariance matrix of temperature is shown in Fig. 2. The results are consistent with the previous study by Du et al. (2008).

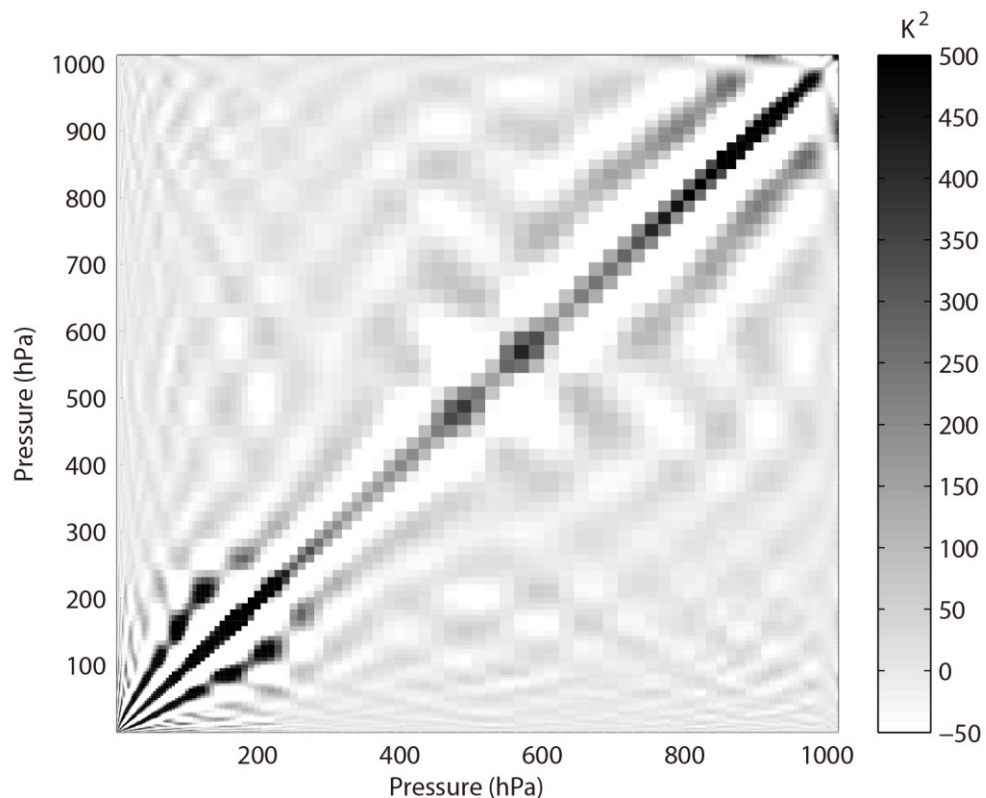

**Figure 2.** Error covariance matrix of temperature (shaded).



The reference atmospheric profiles are from the IFS-137 database, and the temperature weight function matrix is calculated using the RTTOV\_K mode, as shown in Fig. 3; the results are consistent with those of the previous study by Du et al. (2008). For the air-based passive atmospheric remote sensing studied in this paper, when the same channel detects the atmosphere from different observation angles, the value of the weight function matrix  $K$  changes due to the limb effect. The goal of this section is focusing on the selection methods of selecting channels; therefore the biases produced from different observation angles can be ignored.

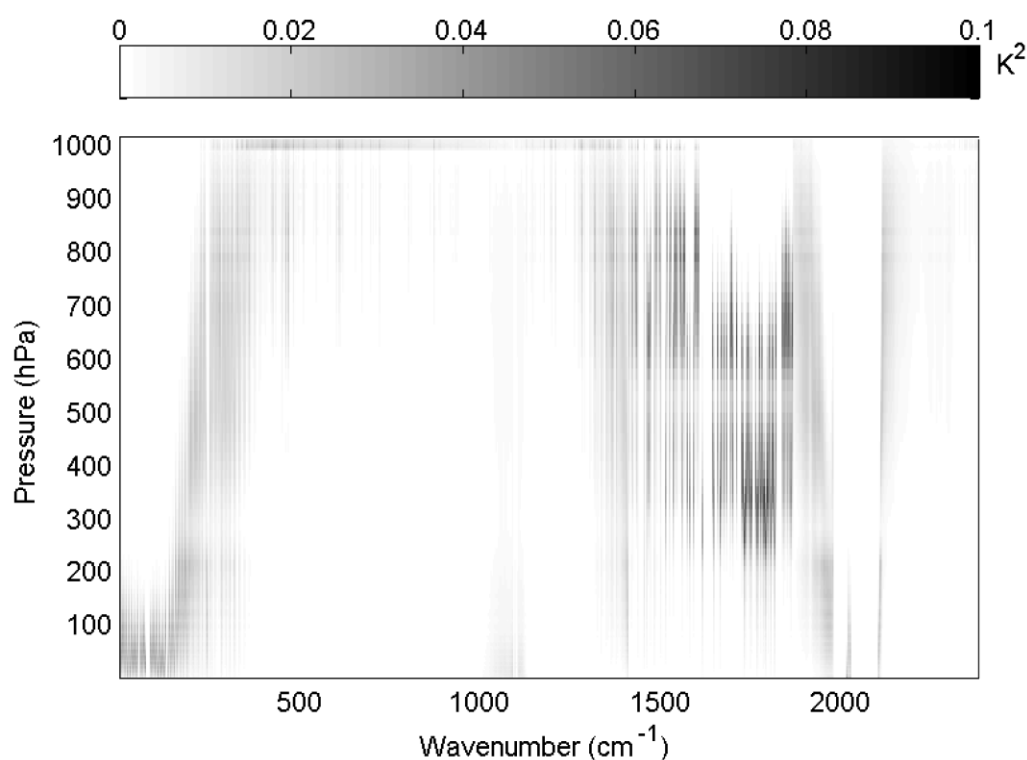

**Figure 3.** Temperature weight function matrix (shaded).

508

509        In order to verify the effectiveness of ICS, the distribution of 324  
510 channels, without considering layering, in the AIRS bright  
511 temperature spectrum is indicated in Fig. 4. The background  
512 brightness temperature is the simulated AIRS observation brightness  
513 temperature, which is from the atmospheric profile in RTTOV put  
514 into the model. Figure 4(a) shows the 324 channels selected by PCS,  
515 while Fig. 4(b) shows the 324 channels selected by NCS.

516

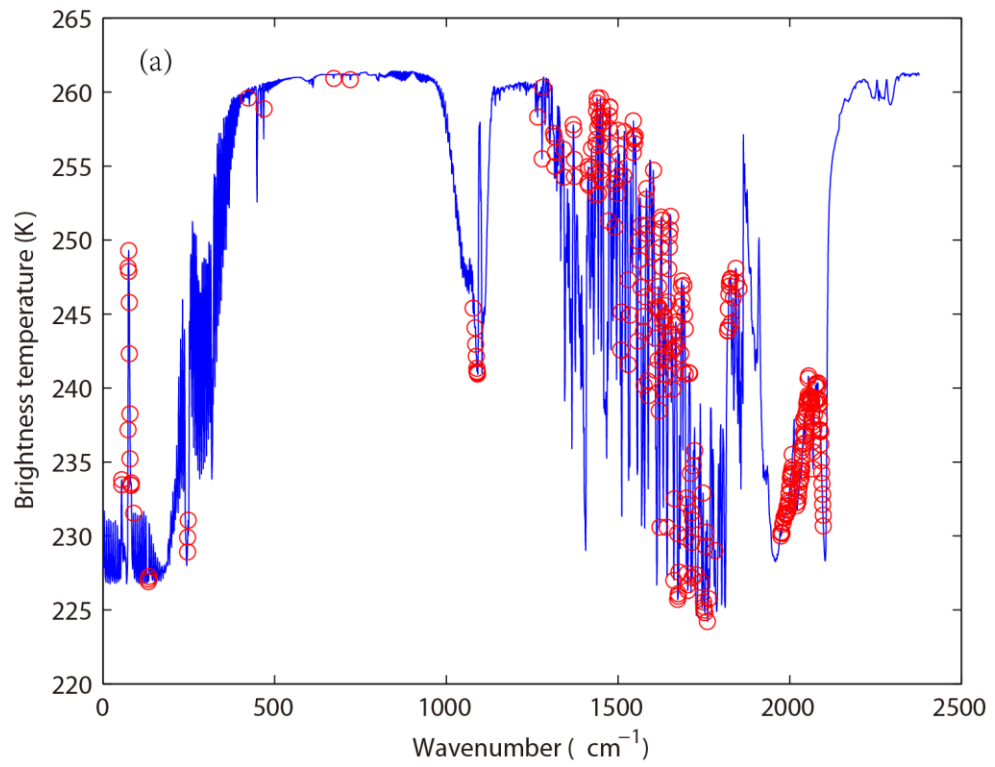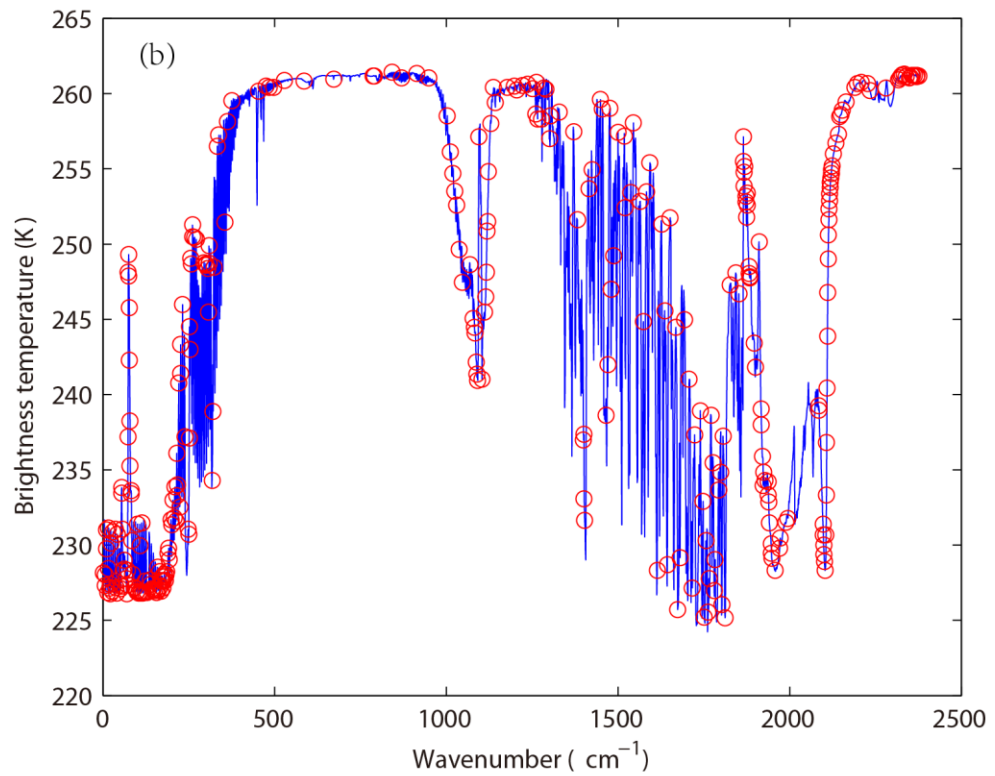

**Figure 4.** The distribution of different channel selection methods without considering layering in the AIRS bright temperature

spectrum (blue line). (a) 324 channels selected by PCS (red circles).  
(b) 324 channels selected by NCS (red circles).

Without considering layering, the main differences between the 324 channels selected by PCS and NCS are as follows: (1) When the wavenumber approaches 1000, the wavelength is 11  $\mu\text{m}$  (1/1000). Near this band, fewer channels are selected by PCS because the retrieval of ground temperature is considered by NCS; (2) When the wavenumber is near 1200, the wavelength is 9  $\mu\text{m}$  (1/1200). Near this band, no channels are selected by PCS because the retrieval of  $\text{O}_3$  is not considered in this paper; (3) When the wavenumber approaches 1500, the wavelength is 6.7  $\mu\text{m}$  (1/1500). As is known, the spectral range from 6  $\mu\text{m}$  to 7  $\mu\text{m}$  corresponds to water vapor absorption bands, but fewer channels are selected by NCS; (4) When the wavenumber is close to 2000, it derives a wavelength of 5  $\mu\text{m}$  (1/2000), which includes 4.2  $\mu\text{m}$  for  $\text{N}_2\text{O}$  and 4.3  $\mu\text{m}$  for  $\text{CO}_2$  absorption bands. As is shown in Fig. 4, fewer channels are selected by PCS in those bands. PCS is favorable for atmospheric temperature detection in the high temperature zone; (5) In the near infrared area, the wavenumber exceeds 2200, deriving a wavelength of less than 4  $\mu\text{m}$  (1/2000). A small number of channels is selected by NCS, but no channels are selected by PCS.

Above all, the information content used in this paper only takes

the temperature profile retrieval into consideration, so the channel combination of PCS is inferior to that of NCS for the retrieval of surface temperature and the O<sub>3</sub> profile. The advantages of the channel selection method based on information content in this paper are mainly reflected in: (1) Near space (20–100 km) is less affected by the ground surface, so the retrieval result of PCS is better than that of NCS. (2) Due to the method selected in this paper there are more channels at 4.2 μm for N<sub>2</sub>O and 4.3 μm for CO<sub>2</sub> absorption bands; the channel combination of PCS is superior to that of NCS for atmospheric temperature detection in the high temperature zone.

By comparing channel selection without considering layering, we note the general advantages and disadvantages of PCS and NCS for the retrieval of atmosphere and can improve the channel selection scheme. First, the retrieval of the temperature profile for 324 channels selected by PCS is obtained. The relationship between the number of iterations and the ARI is shown in Fig. 5.

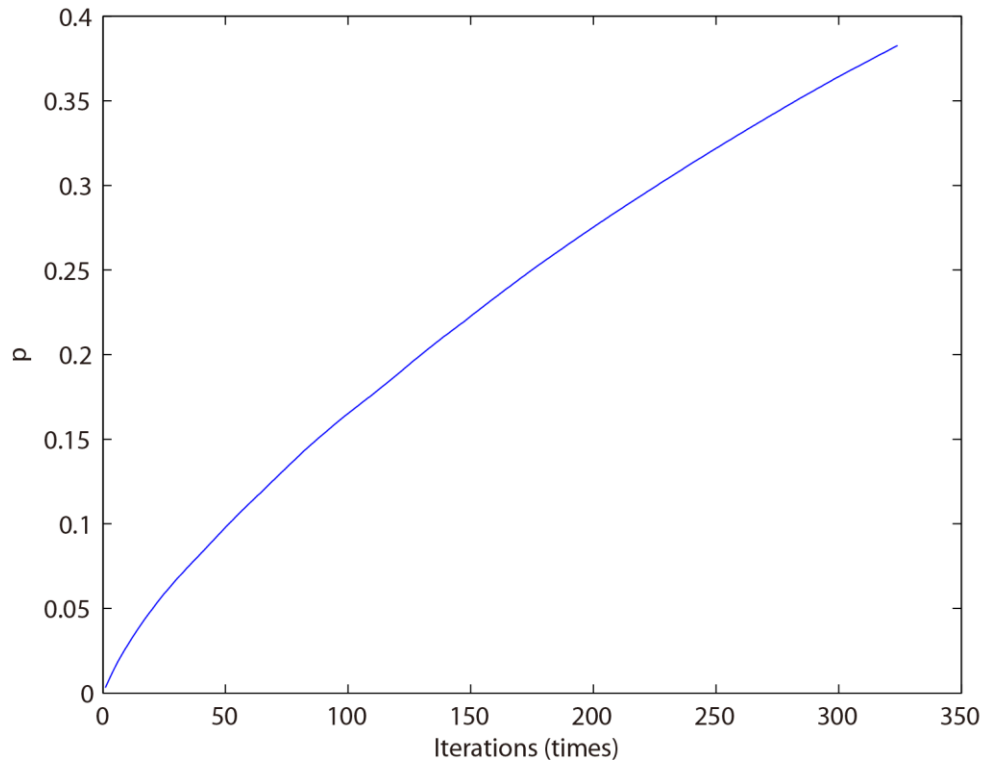

**Figure 5.** The relationship between the number of iterations and ARI for PCS.

The ARI tends to be 0.38 and is not convergent, so the PCS method needs to be improved. In this paper, the atmosphere is divided into 137 layers, and based on the information content and iteration, 324 channels are selected for each layer. Moreover, the temperature profile of each layer can be retrieved. The relationship between the number of iterations and the ARI is shown in Fig. 6. When the number of iterations approaches 100, the ARI of ICS tends to be stable, and reach to 0.54. Thus, in terms of the ARI and convergence, the ICS method is superior to that of PCS.

572

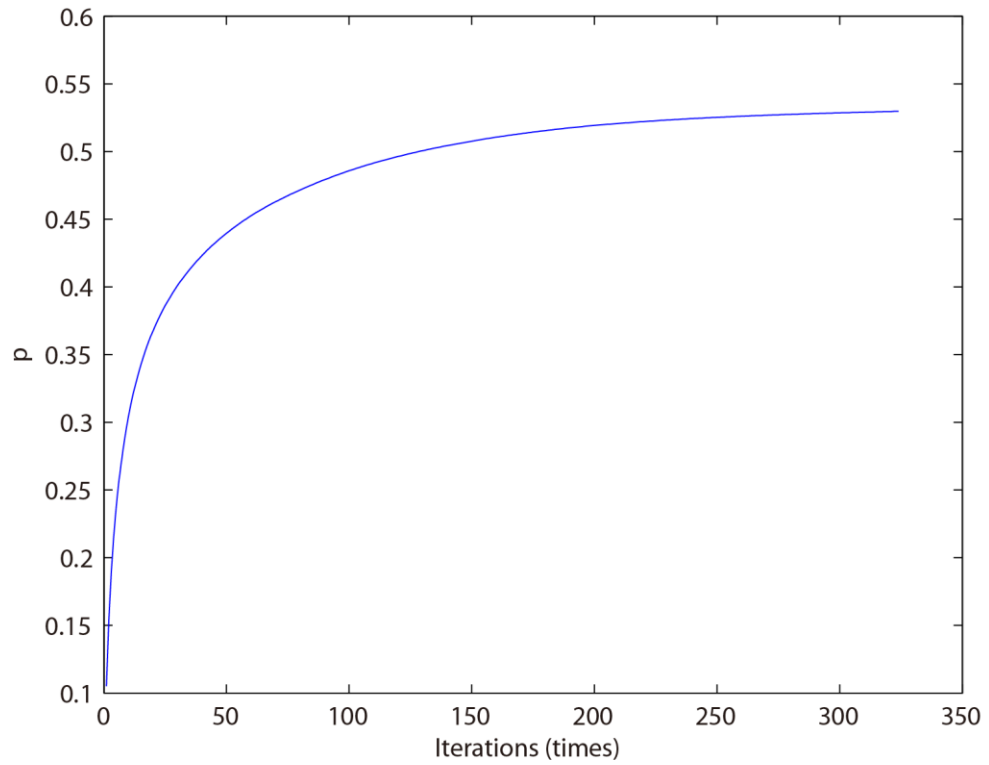

573

574 **Figure 6.** The relationship between the number of iterations and the  
575 ARI for ICS.

576

577 Furthermore, because an iterative method is used to select  
578 channels, the order of each selected channel is determined by the  
579 contribution from the ARI. The weight function matrix of the top  
580 324 selected channels, according to channel order, is shown in Fig.  
581 7.

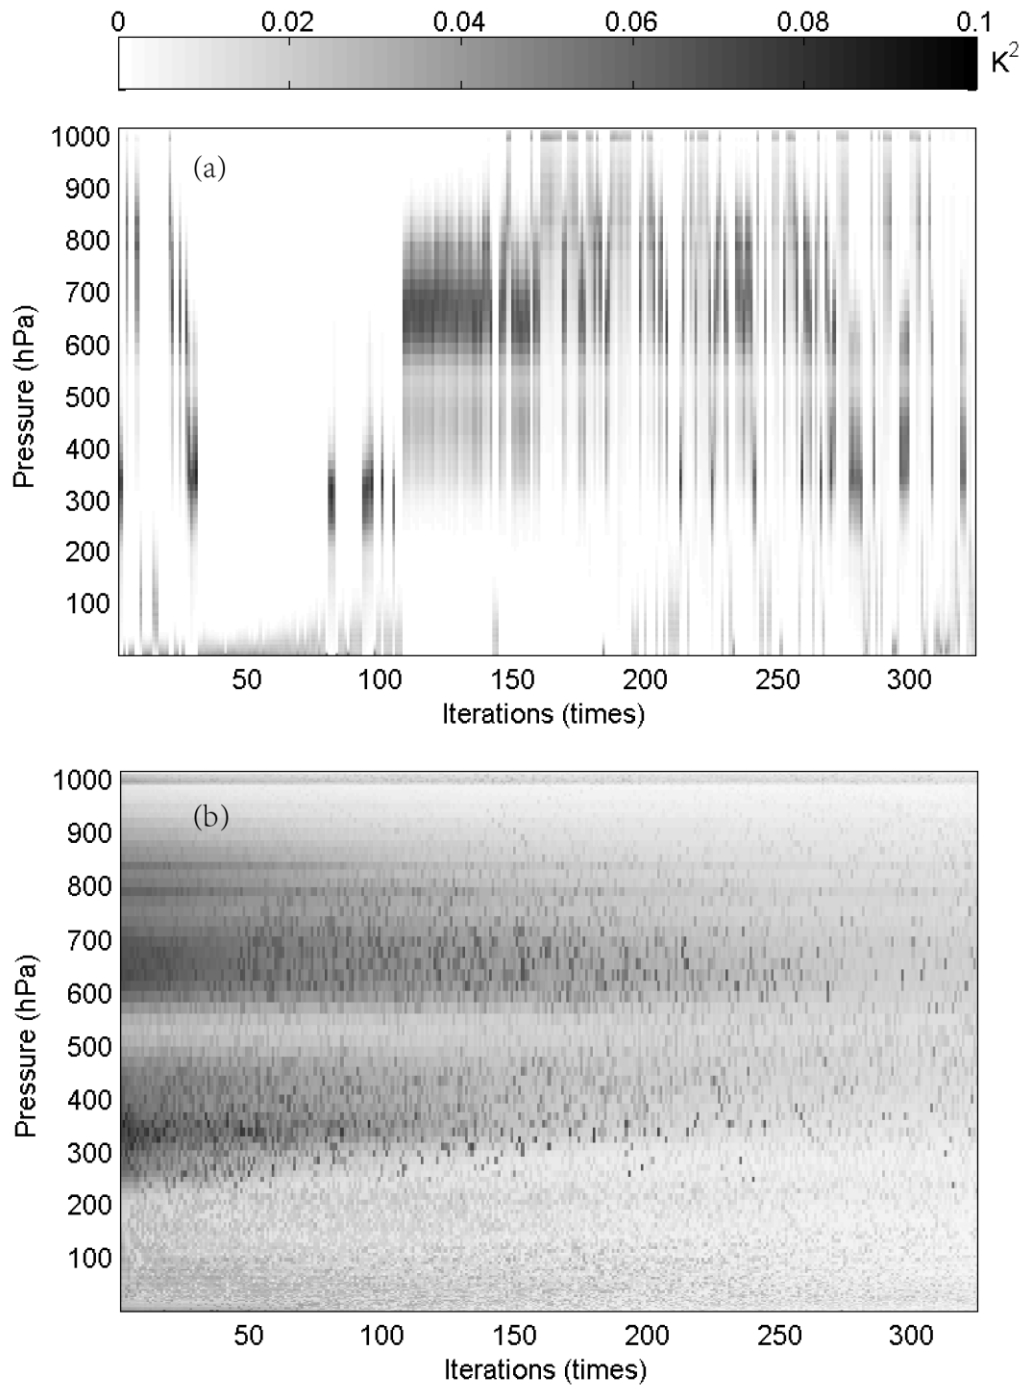

**Figure 7.** The relationship between the number of iterations and the weight function of the top 324 selected channels (shaded). (a) PCS. (b) ICS.



As illustrated in Fig. 7, in the first 100 iterations, the distribution of the temperature weight function for PCS is relatively scattered; it does not reflect continuity between the adjacent layers of the atmosphere. Besides, the ICS result is better than that of PCS, showing that: (1) the distribution of the temperature weight function is more continuous and reflects the continuity between adjacent layers of the atmosphere; (2) regardless of the number of iterations, the maximum value of the weight function is stable near 300–400 hPa and 600–700 hPa, without scattering, which resembles more closely the scenario in real atmosphere.

## **4. Statistical multiple regression experiment**

### **4.1 Temperature profile database**

A new database including a representative collection of 25,000 atmospheric profiles from the European Centre for Medium-range Weather Forecasts (ECMWF) was used. The profiles were given in a 137-level vertical grid extending from the surface up to 0.01 hPa. The database was divided into five subsets focusing on diverse sampling characteristics such as temperature, specific humidity, ozone mixing ratio, cloud condensates, and precipitation. In contrast with earlier releases of the ECMWF diverse profile database, the 137-level database places greater emphasis on preserving the

609 statistical properties of sampled distributions produced by the  
610 Integrated Forecasting System (IFS). IFS-137 spans the period from  
611 September 1, 2013 to August 31, 2014. There are two operational  
612 analyses each day (at 00z and 12z), and the modeling grid contains  
613 2,140,702 grid points. The pressure levels adopted for IFS-137 are  
614 shown in Table A2 (see Table A2 in Appendix A).

615 The locations of selected profiles of temperature, specific  
616 humidity, and cloud condensate subsets of the IFS-91 and IFS-137  
617 databases are plotted on the map in Fig. 8. In the IFS-91 database,  
618 the sampling is fully determined by the selection algorithm, which  
619 makes the geographical distributions very inhomogeneous. Selected  
620 profiles represent those regions where gradients of the sampled  
621 variable are the strongest: in the case of temperature, mid- and  
622 high-latitudes dominate, while humidity and cloud condensate  
623 subsets concentrate at low latitudes. However, the IFS-137 database  
624 shows a much more homogeneous spatial distribution in all the  
625 sampling subsets, which is a consequence of the randomized  
626 selection.

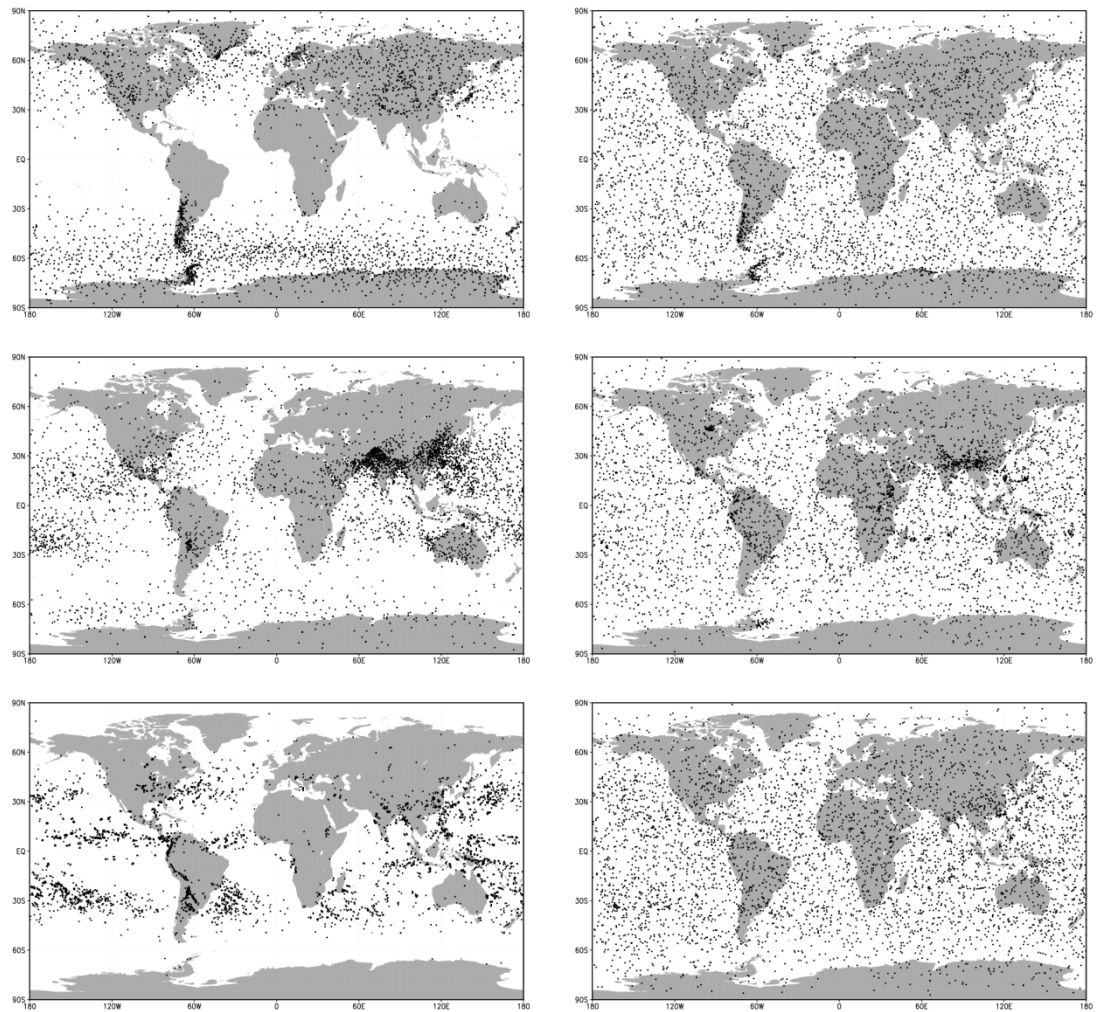

**Figure 8.** Locations of selected profiles in the temperature (top), specific humidity (middle), and cloud condensate (bottom), sampled subsets of the IFS-91 (left) and IFS-137 (right) databases (from <https://www.nwpsaf.eu/site/update-137-level-nwp-profile-dataset/> , 2019).

The temporal distribution of the selected profiles is illustrated in Fig. 9. Again, the lack of randomized selection results in large variations from one month to the next in the case of the IFS-91

database (left panel). The different distributions come mainly from variations in the ozone subset (green parts of each column).

Dominance of randomly-selected profiles in the IFS-137 database leaves little room for monthly variation in the data count (right panel).

Moreover, the IFS-91 database also supports the mode with

input parameters, such as detection angle, 2 m temperature, cloud

information. Therefore, it is feasible to use the selected samples in a

statistical multiple regression experiment.

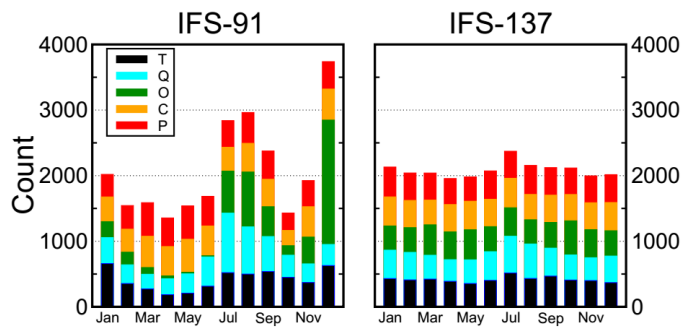

**Figure 9.** Distribution of profiles within the calendar months in IFS-91 (left) and IFS-137 (right) databases. Different subsets are shown in different colors. Black parts stand for temperature. Blue parts represent specific humidity. Green parts indicate ozone subset. Orange parts stand for cloud condensate. Red parts represent precipitation. The last access date is April 26th, 2019. (from <https://www.nwpsaf.eu/site/update-137-level-nwp-profile-dataset/>, 2019).

## 4.2 Experimental scheme

In order to verify the retrieval effectiveness of ICS, 5000 temperature profiles provided by the IFS-137 were used for statistical inversion comparison experiments. The steps are as follows:

(1) 5000 profiles and their corresponding surface factors, including surface air pressure, surface temperature, 2 m temperature, 2 m specific humidity, 10 m wind speed, etc. are put into the RTTOV mode. Then, the AIRS observation brightness temperature is obtained.

(2) The retrieval of temperature is carried out in accordance with Eq. (23). The 5000 profiles are divided into two groups. The first group of 2500 profiles is used to obtain the regression coefficient, and the second group of 2500 is used to test the result.

(3) Verification of the results. The test is carried out based on the standard deviation between the retrieval value and the true value.

### **4.3 Results and Discussion**

For the statistical inversion comparison experiments, the standard deviation of temperature retrieval is shown in Fig. 10. First, because PCS does not take channel sensitivity as a function of height into consideration, the retrieval result of PCS is inferior to that of ICS. Second, by comparing the results of ICS and NCS we found that

below 100 hPa, since the method used in this paper considers near ground to be less of an influencing factor, the channel combination of ICS is slightly inferior to that of NCS, but the difference is small.

From 100 hPa to 10 hPa, the retrieval temperature of ICS in this paper is consistent with that of NCS, slightly better than the channel selected for NCS. From 10 hPa to 0.02 hPa, near the space layer, the retrieval temperature of ICS is obviously better than that of NCS. In terms of the standard deviation, the channel combination of ICS is slightly better than that of PCS from 100 hPa to 10 hPa. From 10 hPa to 0.02 hPa, the standard deviation of ICS is lower than that of NCS at about 1 K, meaning that the retrieval result of ICS is better than that of NCS.

In order to further illustrate the effectiveness of ICS, the mean improvement value of the ICS and its percentages compared with the PCS and NCS in different height are shown in Table 1. Because PCS does not take channel sensitivity as a function of height into consideration, the retrieval result of PCS is inferior to that of ICS. In general, the accuracy of the retrieval temperature of ICS is improved. Especially, from 100 hPa to 0.01 hPa, the mean value of ICS is evidently improved by more than 0.5 K which means the accuracy can be improved by more than 11%. By comparing the results of ICS and NCS we found that below 100 hPa, since the method used in this

paper considers near ground to be less of an influencing factor, the channel combination of ICS is slightly inferior to that of NCS, but the difference is small. From 100 hPa to 0.01 hPa, the mean value of ICS is improved by more than 0.36 K which means the accuracy can be improved by more than 9.6%.

**Table 1.** The mean improvement value of the ICS and its percentages compared with the PCS and NCS in different height.

| Pressure       | Improved mean value<br>/Percentage compared with PCS | Improved value<br>/Percentage compared with<br>NCS |
|----------------|------------------------------------------------------|----------------------------------------------------|
| hPa            | K/%                                                  | K/%                                                |
| surface-100hPa | 0.24/10.77%                                          | -0.04/-3.27%                                       |
| 100hPa-10hPa   | 0.15/5.08%                                           | 0.06/2.4%                                          |
| 10hPa-1hPa     | 0.04/0.64%                                           | 0.17/2.99%                                         |
| 1hPa-0.01hPa   | 0.52/11.92%                                          | 0.36/9.57%                                         |

This is because, as shown in Fig. 4: (1) Near space (20–100 km) is less affected by the ground surface, so the retrieval result of PCS is better than that of NCS. (2) Due to the method selected in this paper, there are more channels at 4.2  $\mu\text{m}$  for  $\text{N}_2\text{O}$  and 4.3  $\mu\text{m}$  for  $\text{CO}_2$  absorption bands, and the channel combination of PCS is superior to that of NCS for atmospheric temperature detection in the high temperature zone. Moreover, ICS takes channel sensitivity as a function of height into consideration, so its retrieval result is impressive.

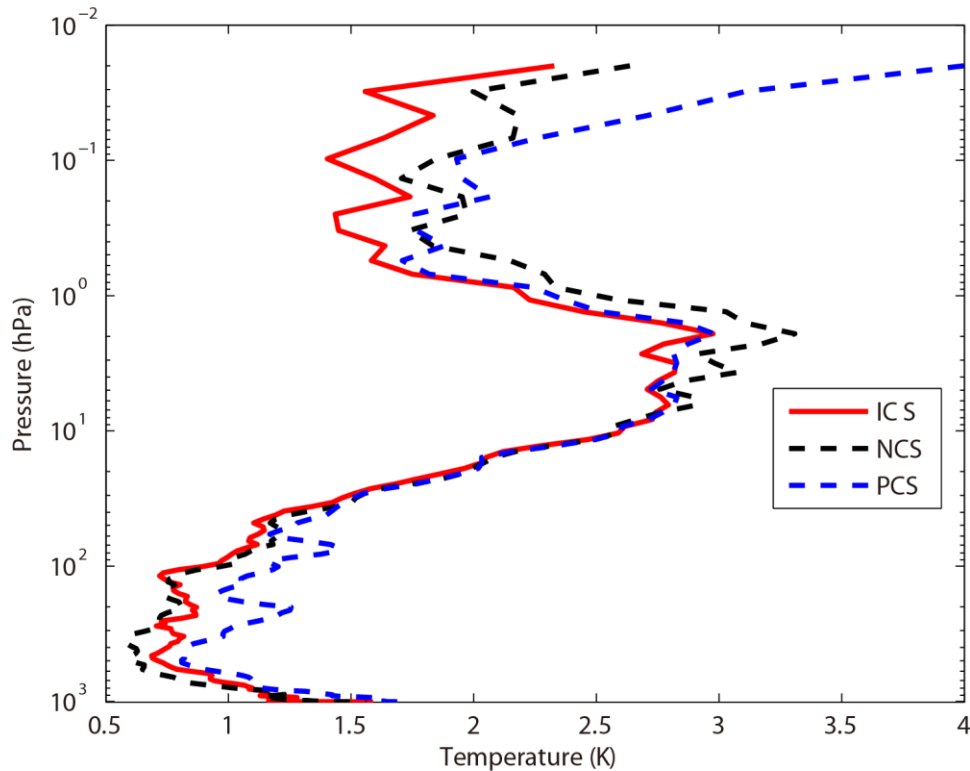

719

720 **Figure 10.** The temperature profile standard deviation of statistical  
 721 inversion comparison experiments. Red line indicates the result of  
 722 ICS. Black dotted line stands for the result of NCS. Blue dotted line  
 723 represents the result of PCS.

724

## 725 **5 Statistical inversion comparison experiments in four typical** 726 **regions**

727 The accuracy of the retrieval temperature varies from place to place  
 728 and changes with weather conditions. Therefore, in order to further  
 729 compare the inversion accuracy under different atmospheric  
 730 conditions, this paper divided the atmospheric profile from the



IFS-137 database introduced in Sect. 4 into four regions: equatorial zone, subtropical region, mid-latitude region and Arctic. The profiles of these regions can represent the global typical atmospheric temperature profiles. The average temperature profiles in these four regions are shown in Fig. 11. The retrieval temperature varies from place to place and changes with weather conditions. In order to further compare the regional differences of inversion accuracy, the temperature standard deviations of ICS in four typical regions are compared in Sect. 5.2.

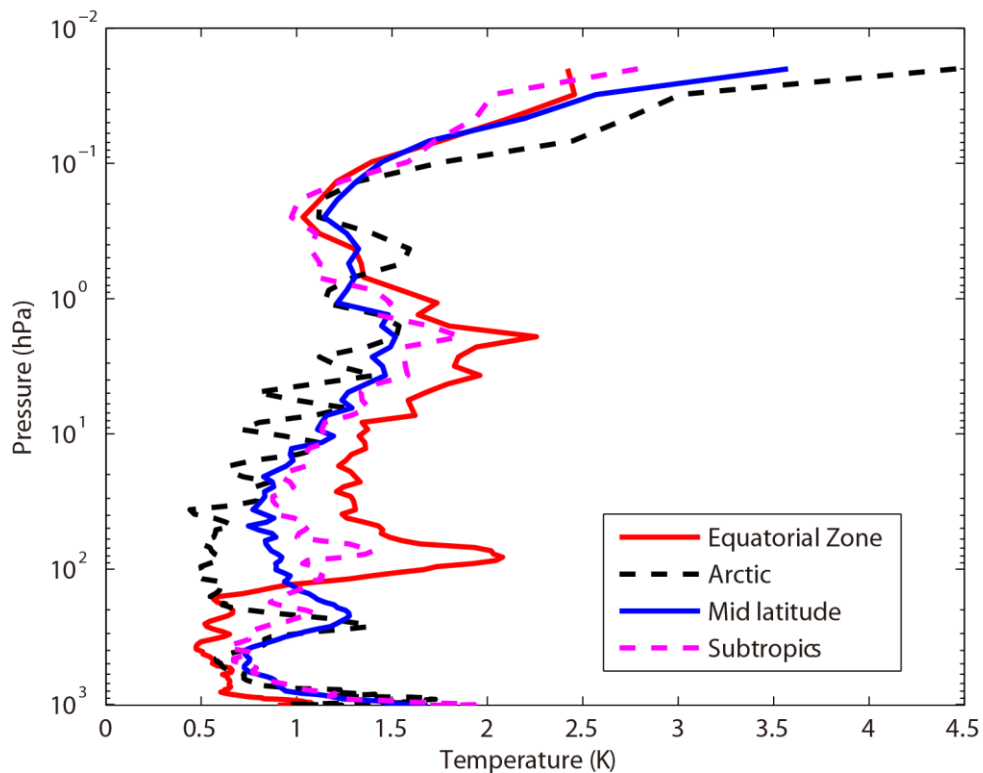

**Figure 11.** The average temperature profiles in four typical regions. Red line indicates the equatorial zone. Pink dotted line stands for the

subtropics. Blue dotted line represents the mid-latitude region. Black dotted line stands for the Arctic.

## **5.1 Experimental scheme**

In order to further illustrate the different accuracy of the retrieval temperature using our improved channel selection method under different atmospheric conditions, the profiles in four typical regions were used for statistical inversion comparison experiments. The experimental steps are as follows:

(1) 2500 profiles in Sect. 4 are used to work out the regression coefficient.

(2) The atmospheric profiles of the four typical regions: equatorial zone, subtropical region, mid-latitude region and Arctic are used for statistical inversion comparison experiments and test the result.(3) Verification of the results. The test is carried out based on the standard deviation between the retrieval value and the true value.

## **5.2 Results and Discussion**

Using statistical inversion comparison experiments in four typical regions, the standard deviation of temperature retrieval is shown in Fig. 12. Generally, the retrieval temperature by ICS is greatly

superior to that of NCS and PCS. In particular, above 1 hPa (the near space layer), the standard deviation of atmospheric temperature can be optimized to 1 K with PCS and NCS. Thus, ICS shows a great improvement. The results were consistent with Sect. 4.

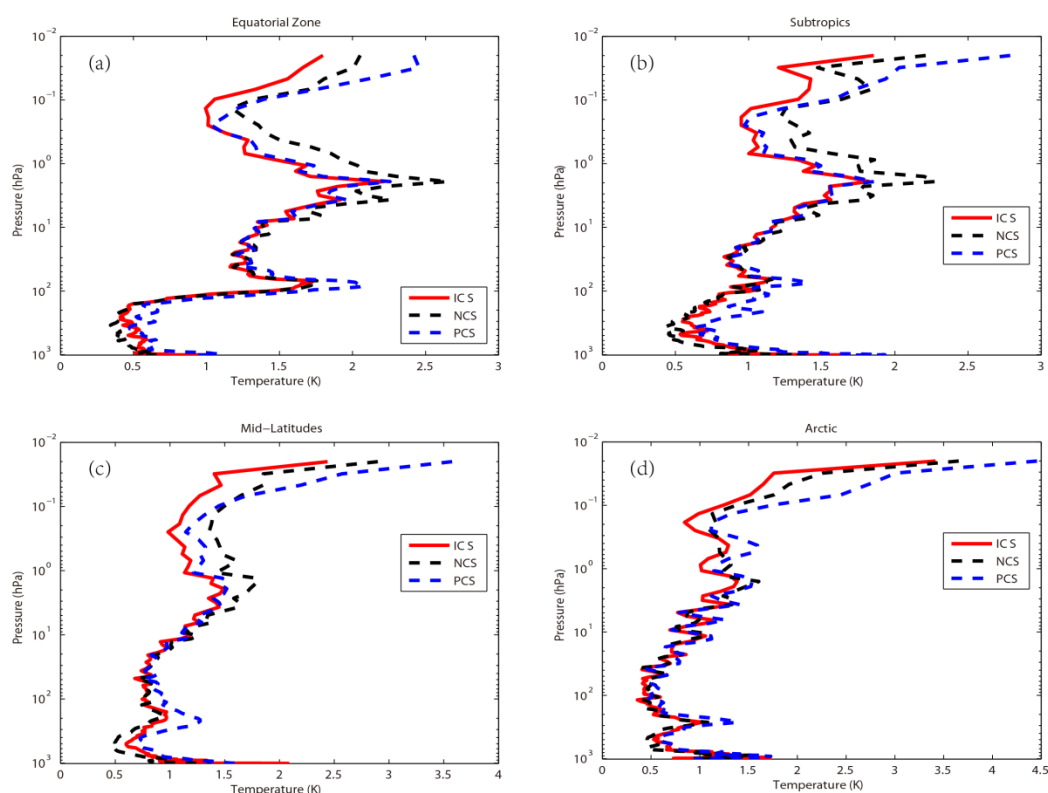

**Figure 12.** The temperature profile standard deviation of statistical inversion comparison experiments in four typical regions. Red line indicates the result of ICS. Black dotted line stands for the result of NCS. Blue dotted line represents the result of PCS. (a) Equatorial zone. (b) Subtropics. (c) Mid-latitudes. (d) Arctic.

In order to further compare the regional differences of inversion

accuracy, the temperature standard deviation of ICS in four typical regions are compared in Fig. 13.

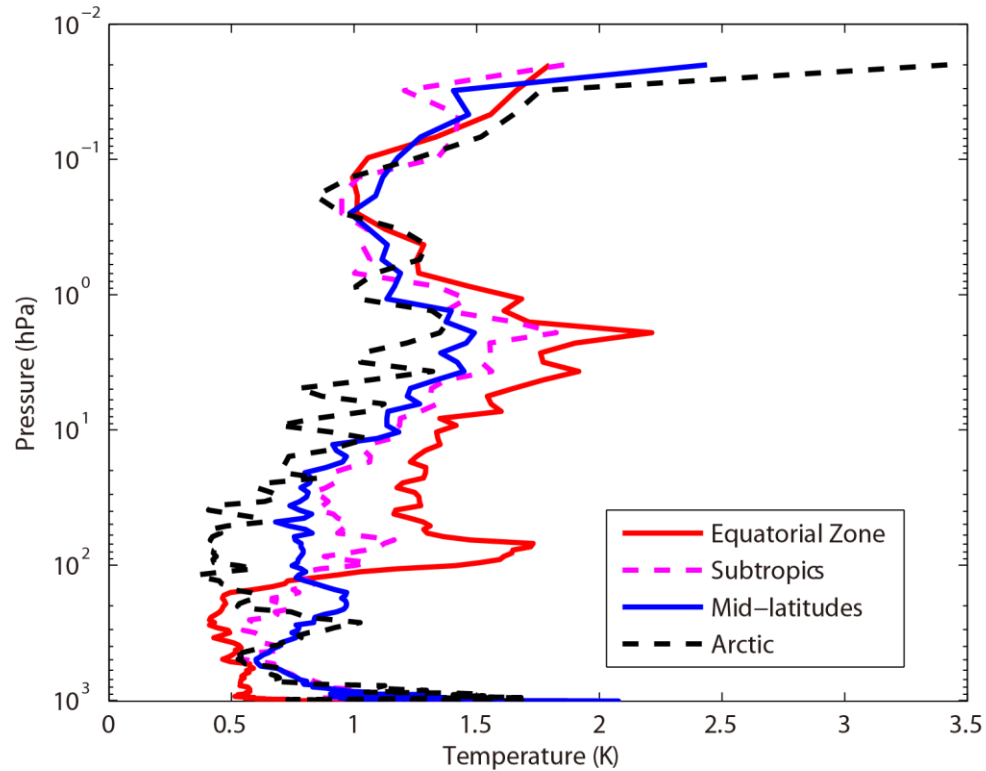

**Figure 13.** The temperature standard deviation of ICS in four typical regions. Red line indicates the result of equatorial zone. Pink dotted line represents the result of Subtropics. Blue line represents the result of Mid-latitudes. Black dotted line stands for the result of Arctic.

The temperature standard deviations of the ICS in the four typical regions are large (Fig. 13). Below 100 hPa, due to the high temperature in the equatorial zone, the channel combination of ICS

is superior to that of PCS and NCS for atmospheric temperature detection in the high temperature zone. The standard deviation is 0.5K. Due to the method selected in this paper there are more channels at 4.2  $\mu\text{m}$  for  $\text{N}_2\text{O}$  and 4.3  $\mu\text{m}$  for  $\text{CO}_2$  absorption bands which has been previously described in Sect. 3. Near the tropopause, the standard deviation of the equatorial zone increases sharply. It is also due to the sharp drops in temperature. However, the standard deviation of the Arctic is still around 0.5K. From 100hPa to 1hPa, the standard deviation of ICS is 0.5 K to 2K. With the increase of latitude, the effectiveness considerably increases. According to Fig. 12, ICS takes channel sensitivity as a function of height into consideration, so its retrieval result is impressive.

In order to further illustrate the effectiveness of ICS, the mean improvement value of the ICS and its percentages compared with the PCS and NCS in different height of four typical regions are shown in Table 2 to Table 5.

**Table 2.** The mean improvement value of the ICS and its percentages compared with the PCS and NCS in different height in equatorial zone.

| Pressure | Improved mean value<br>/Percentage compared with PCS | Improved value<br>/Percentage compared with<br>NCS |
|----------|------------------------------------------------------|----------------------------------------------------|
|----------|------------------------------------------------------|----------------------------------------------------|

| hPa            | K/%         | K/%          |
|----------------|-------------|--------------|
| surface-100hPa | 0.18/12.25% | -0.06/-5.61% |
| 100hPa-10hPa   | 0.13/4.23%  | 0.04/1.28%   |
| 10hPa-1hPa     | 0.03/0.09%  | 0.24/6.24%   |
| 1hPa-0.01hPa   | 0.24/7.41%  | 0.33/11.22%  |

812

813 **Table 3.** The mean improvement value of the ICS and its  
814 percentages compared with the PCS and NCS in different height in  
815 subtropics.

| Pressure       | Improved mean value<br>/Percentage compared with PCS | Improved value<br>/Percentage compared with NCS |
|----------------|------------------------------------------------------|-------------------------------------------------|
| hPa            | K/%                                                  | K/%                                             |
| surface-100hPa | 0.26/12.49%                                          | -0.08/-5.94%                                    |
| 100hPa-10hPa   | 0.08/3.55%                                           | 0.02/1.28%                                      |
| 10hPa-1hPa     | 0.02/0.56%                                           | 0.2/5.94%                                       |
| 1hPa-0.01hPa   | 0.25/7.73%                                           | 0.34/12.51%                                     |

816

817 **Table 4.** The mean improvement value of the ICS and its  
818 percentages compared with the PCS and NCS in different height in  
819 mid-latitudes.

| Pressure       | Improved mean value<br>/Percentage compared with<br>PCS | Improved value<br>/Percentage compared with<br>NCS |
|----------------|---------------------------------------------------------|----------------------------------------------------|
| hPa            | K/%                                                     | K/%                                                |
| surface-100hPa | 0.18/9.23%                                              | -0.13/-7.41%                                       |
| 100hPa-10hPa   | 0.06/3.68%                                              | 0.03/1.84%                                         |
| 10hPa-1hPa     | 0.03/1.03%                                              | 0.18/6.01%                                         |
| 1hPa-0.01hPa   | 0.36/10.64%                                             | 0.36/12.71%                                        |

820

821 **Table 5.** The mean improvement value of the ICS and its

percentages compared with the PCS and NCS in different height in Arctic.

| Pressure       | Improved mean value<br>/Percentage compared with PCS | Improved value<br>/Percentage compared with NCS |
|----------------|------------------------------------------------------|-------------------------------------------------|
| hPa            | K/%                                                  | K/%                                             |
| surface-100hPa | 0.12/6.52%                                           | -0.05/-3.47%                                    |
| 100hPa-10hPa   | 0.08/6.59%                                           | 0.02/1.97%                                      |
| 10hPa-1hPa     | 0.09/3.64%                                           | 0.06/2.5%                                       |
| 1hPa-0.01hPa   | 0.49/13.72%                                          | 0.18/6.47%                                      |

Although the improvements of ICS in the four typical regions are different, in general, the accuracy of the retrieval temperature of ICS is improved. Because PCS does not take channel sensitivity as a function of height into consideration, the retrieval result of PCS is inferior to that of ICS. In general, the accuracy of the retrieval temperature of ICS is improved. Especially, from 100 hPa to 0.01 hPa, the accuracy of ICS can be improved by 7% to 13%. By comparing the results of ICS and NCS we found that below 100 hPa, since the method used in this paper considers near ground to be less of an influencing factor, the channel combination of ICS is slightly inferior to that of NCS, but the difference is small. From 100 hPa to 0.01 hPa, the accuracy of ICS can be improved by 7% to 13%.

## 6. Conclusions and discussion

## 6.1 Conclusions

An improved channel selection method is proposed, based on information content in this paper. A robust channel selection scheme and method are proposed, and a series of channel selection comparison experiments are conducted. The results are as follows:

(1) Since ICS takes channel sensitivity as a function of height into consideration, the ARI of PCS only tends to be 0.38 and is not convergent. However, as the 100<sup>th</sup> iteration is approached, the ARI of ICS tends to be stable, reaching 0.54, while the distribution of the temperature weight function is more continuous and closer to that of the actual atmosphere. Thus, in terms of the ARI, convergence, and the distribution of the temperature weight function, ICS is superior to PCS.

(2) Statistical inversion comparison experiments show that the retrieval temperature of ICS in this paper is consistent with that of NCS. In particular, from 10 hPa to 0.02 hPa (the near space layer), the retrieval temperature of ICS is obviously better than that of NCS at about 1 K. In general, the accuracy of the retrieval temperature of ICS is improved. Especially, from 100 hPa to 0.01 hPa, the accuracy of ICS can be improved by more than 11%. The reason is that near space (20–100 km) is less affected by the ground surface, so the retrieval result of ICS is better than that of NCS. Additionally, due to



the method selected in this paper there are more channels at 4.2  $\mu\text{m}$  for the  $\text{N}_2\text{O}$  and at 4.3  $\mu\text{m}$  for the  $\text{CO}_2$  absorption bands; the channel combination of ICS is superior to that of NCS for atmospheric temperature detection in the high temperature zone.

(3) Statistical inversion comparison experiments in four typical regions indicate that ICS in this paper is significantly better than NCS and PCS in different regions and shows latitudinal variations. Especially, from 100 hPa to 0.01 hPa, the accuracy of ICS can be improved by 7% to 13%, which means the ICS method selected in this paper is feasible and shows great promise for applications.

## **6.2 Discussion**

In recent years, the atmospheric layer in the altitude range of about 20–100 km has been named “the near space layer” by aeronautical and astronautical communities. It is between the space-based satellite platform and the aerospace vehicle platform, which is the transition zone between aviation and aerospace. Its unique resource has attracted a lot of attention from many countries. Research and exploration, therefore, on and of the near space layer are of great importance. A new channel selection scheme and method for hyperspectral atmospheric infrared sounder AIRS data based on layering are proposed. The retrieval results of ICS concerning the

near space atmosphere are particularly good. Thus, ICS aims to provide a new and an effective channel selection method for the study of the near space atmosphere using the hyperspectral atmospheric infrared sounder.

*Data availability.* The data used in this paper are available from the corresponding author upon request.

## Appendices

### Appendix A

**Table A1.** Pressure levels adopted for RTTOV v12 54 pressure level coefficients and profile limits within which the transmittance calculations are valid. Note that the gas units here are ppmv. (From <https://www.nwpsaf.eu/site/software/rttov/>, RTTOV Users guide, 2019).

| Level  | Pressure | Tmax   | Tmin   | Qmax  | Qmin  | Q <sub>2</sub> max | Q <sub>2</sub> min | Q <sub>2</sub> Ref |
|--------|----------|--------|--------|-------|-------|--------------------|--------------------|--------------------|
| Number | hPa      | K      | K      | ppmv* | ppmv* | ppmv*              | ppmv*              | ppmv*              |
| 1      | 0.01     | 245.95 | 143.66 | 5.24  | 0.91  | 1.404              | 0.014              | 0.296              |
| 2      | 0.01     | 252.13 | 154.19 | 6.03  | 1.08  | 1.410              | 0.069              | 0.321              |
| 3      | 0.03     | 263.71 | 168.42 | 7.42  | 1.35  | 1.496              | 0.108              | 0.361              |
| 4      | 0.03     | 280.12 | 180.18 | 8.10  | 1.58  | 1.670              | 0.171              | 0.527              |
| 5      | 0.13     | 299.05 | 194.48 | 8.44  | 1.80  | 2.064              | 0.228              | 0.769              |
| 6      | 0.23     | 318.64 | 206.21 | 8.59  | 1.99  | 2.365              | 0.355              | 1.074              |
| 7      | 0.41     | 336.24 | 205.66 | 8.58  | 2.49  | 2.718              | 0.553              | 1.471              |
| 8      | 0.67     | 342.08 | 197.17 | 8.34  | 3.01  | 3.565              | 0.731              | 1.991              |

|    |        |        |        |          |      |        |       |       |
|----|--------|--------|--------|----------|------|--------|-------|-------|
| 9  | 1.08   | 340.84 | 189.50 | 8.07     | 3.30 | 5.333  | 0.716 | 2.787 |
| 10 | 1.67   | 334.68 | 179.27 | 7.89     | 3.20 | 7.314  | 0.643 | 3.756 |
| 11 | 2.50   | 322.5  | 17627  | 7.75     | 2.92 | 9.191  | 0.504 | 4.864 |
| 12 | 3.65   | 312.51 | 175.04 | 7.69     | 2.83 | 10.447 | 0.745 | 5.953 |
| 13 | 5.19   | 303.89 | 173.07 | 7.58     | 2.70 | 12.336 | 1.586 | 6.763 |
| 14 | 7.22   | 295.48 | 168.38 | 7.53     | 2.54 | 12.936 | 1.879 | 7.109 |
| 15 | 9.84   | 293.33 | 166.30 | 7.36     | 2.46 | 12.744 | 1.322 | 7.060 |
| 16 | 13.17  | 287.05 | 16347  | 7.20     | 2.42 | 11.960 | 0.719 | 6.574 |
| 17 | 17.33  | 283.36 | 161.49 | 6.96     | 2.20 | 11.105 | 0.428 | 5.687 |
| 18 | 22.46  | 280.93 | 161.47 | 6.75     | 1.71 | 9.796  | 0.278 | 4.705 |
| 19 | 28.69  | 282.67 | 162.09 | 6.46     | 1.52 | 8.736  | 0.164 | 3.870 |
| 20 | 36.17  | 27993  | 162.49 | 6.14     | 1.31 | 7.374  | 0.107 | 3.111 |
| 21 | 45.04  | 27315  | 164.66 | 5.90     | 1.36 | 6.799  | 0.055 | 2.478 |
| 22 | 55.44  | 265.93 | 166.19 | 6.21     | 1.30 | 5.710  | 0.048 | 1.907 |
| 23 | 67.51  | 264.7  | 167.42 | 9.17     | 1.16 | 4.786  | 0.043 | 1.440 |
| 24 | 81.37  | 261.95 | 159.98 | 17.89    | 0.36 | 4.390  | 0.038 | 1.020 |
| 25 | 97.15  | 262.43 | 163.95 | 20.30    | 0.01 | 3.619  | 0.016 | 0.733 |
| 26 | 114.94 | 259.57 | 168.59 | 33.56    | 0.01 | 2.977  | 0.016 | 0.604 |
| 27 | 134.83 | 259.26 | 169.71 | 102.24   | 0.01 | 2.665  | 0.016 | 0.489 |
| 28 | 156.88 | 260.13 | 169.42 | 285.00   | 0.01 | 2.351  | 0.013 | 0.388 |
| 29 | 181.14 | 262.27 | 17063  | 714.60   | 0.01 | 1.973  | 0.010 | 0.284 |
| 30 | 207.61 | 264.45 | 174.11 | 1464.00  | 0.01 | 1.481  | 0.013 | 0.196 |
| 31 | 236.28 | 270.09 | 177.12 | 2475.60  | 0.01 | 1.075  | 0.016 | 0.145 |
| 32 | 267.10 | 277.93 | 181.98 | 4381.20  | 0.01 | 0.774  | 0.015 | 0.110 |
| 33 | 300.00 | 285.18 | 184.76 | 6631.20  | 0.01 | 0.628  | 0.015 | 0.086 |
| 34 | 334.86 | 293.68 | 187.69 | 9450.00  | 1.29 | 0.550  | 0.016 | 0.073 |
| 35 | 371.55 | 300.12 | 190.34 | 12432.00 | 1.52 | 0.447  | 0.015 | 0.063 |
| 36 | 409.89 | 302.63 | 194.40 | 15468.00 | 2.12 | 0.361  | 0.015 | 0.057 |
| 37 | 449.67 | 304.43 | 198.46 | 18564.00 | 2.36 | 0.284  | 0.015 | 0.054 |
| 38 | 490.85 | 307.2  | 201.53 | 21684.00 | 2.91 | 0.247  | 0.015 | 0.052 |

|    |         |        |        |          |      |       |       |       |
|----|---------|--------|--------|----------|------|-------|-------|-------|
| 39 | 532.56  | 31217  | 202.74 | 24696.00 | 3.67 | 0.199 | 0.015 | 0.050 |
| 40 | 572.15  | 31556  | 201.61 | 27480.00 | 3.81 | 0.191 | 0.012 | 0.050 |
| 41 | 618.07  | 318.26 | 189.95 | 30288.00 | 6.82 | 0.171 | 0.010 | 0.049 |
| 42 | 661.00  | 321.71 | 189.95 | 32796.00 | 6.07 | 0.128 | 0.009 | 0.048 |
| 43 | 703.59  | 327.95 | 189.95 | 55328.00 | 6.73 | 0.124 | 0.009 | 0.047 |
| 44 | 745.48  | 333.77 | 189.95 | 37692.00 | 8.71 | 0.117 | 0.009 | 0.046 |
| 45 | 786.33  | 336.46 | 189.95 | 39984.00 | 8.26 | 0.115 | 0.008 | 0.045 |
| 46 | 825.75  | 338.54 | 189.95 | 42192.00 | 7.87 | 0.113 | 0.008 | 0.043 |
| 47 | 863.40  | 342.55 | 189.95 | 44220.00 | 7.53 | 0.111 | 0.007 | 0.041 |
| 48 | 898.93  | 346.23 | 189.95 | 46272.00 | 7.23 | 0.108 | 0.006 | 0.040 |
| 49 | 931.99  | 34924  | 189.95 | 47736.00 | 6.97 | 0.102 | 0.006 | 0.038 |
| 50 | 962.26  | 349.92 | 189.95 | 51264.00 | 6.75 | 0.099 | 0.006 | 0.034 |
| 51 | 989.45  | 350.09 | 189.95 | 49716.00 | 6.57 | 0.099 | 0.006 | 0.030 |
| 52 | 1013.29 | 360.09 | 189.95 | 47208.00 | 6.41 | 0.094 | 0.006 | 0.028 |
| 53 | 1033.54 | 350.09 | 189.95 | 47806.00 | 6.29 | 0.094 | 0.006 | 0.027 |
| 54 | 1050.00 | 350.09 | 189.95 | 47640.00 | 6.19 | 0.094 | 0.006 | 0.027 |

898

899 **Table A2.** Pressure levels adopted for IFS-137 137 pressure levels  
900 (in hPa).

| Level<br>number | pressure<br>hPa | Level<br>number | pressure<br>hPa | Level<br>number | pressure<br>hPa | Level<br>number | pressure<br>hPa | Level<br>number | pressure<br>hPa |
|-----------------|-----------------|-----------------|-----------------|-----------------|-----------------|-----------------|-----------------|-----------------|-----------------|
| 1               | 0.02            | 31              | 12.8561         | 61              | 106.4153        | 91              | 424.019         | 121             | 934.7666        |
| 2               | 0.031           | 32              | 14.2377         | 62              | 112.0681        | 92              | 441.5395        | 122             | 943.1399        |
| 3               | 0.0467          | 33              | 15.7162         | 63              | 117.9714        | 93              | 459.6321        | 123             | 950.9082        |
| 4               | 0.0683          | 34              | 17.2945         | 64              | 124.1337        | 94              | 478.3096        | 124             | 958.1037        |
| 5               | 0.0975          | 35              | 18.9752         | 65              | 130.5637        | 95              | 497.5845        | 125             | 964.7584        |
| 6               | 0.1361          | 36              | 20.761          | 66              | 137.2703        | 96              | 517.4198        | 126             | 970.9046        |
| 7               | 0.1861          | 37              | 22.6543         | 67              | 144.2624        | 97              | 537.7195        | 127             | 976.5737        |
| 8               | 0.2499          | 38              | 24.6577         | 68              | 151.5493        | 98              | 558.343         | 128             | 981.7968        |
| 9               | 0.3299          | 39              | 26.7735         | 69              | 159.1403        | 99              | 579.1926        | 129             | 986.6036        |
| 10              | 0.4288          | 40              | 29.0039         | 70              | 167.045         | 100             | 600.1668        | 130             | 991.023         |
| 11              | 0.5496          | 41              | 31.3512         | 71              | 175.2731        | 101             | 621.1624        | 131             | 995.0824        |
| 12              | 0.6952          | 42              | 33.8174         | 72              | 183.8344        | 102             | 642.0764        | 132             | 998.8081        |

|    |         |    |          |    |          |     |          |     |          |
|----|---------|----|----------|----|----------|-----|----------|-----|----------|
| 13 | 0.869   | 43 | 36.4047  | 73 | 192.7389 | 103 | 662.8084 | 133 | 1002.225 |
| 14 | 1.0742  | 44 | 39.1149  | 74 | 201.9969 | 104 | 683.262  | 134 | 1005.356 |
| 15 | 1.3143  | 45 | 41.9493  | 75 | 211.6186 | 105 | 703.3467 | 135 | 1008.224 |
| 16 | 1.5928  | 46 | 44.9082  | 76 | 221.6146 | 106 | 722.9795 | 136 | 1010.849 |
| 17 | 1.9134  | 47 | 47.9915  | 77 | 231.9954 | 107 | 742.0855 | 137 | 1013.25  |
| 18 | 2.2797  | 48 | 51.199   | 78 | 242.7719 | 108 | 760.5996 |     |          |
| 19 | 2.6954  | 49 | 54.5299  | 79 | 253.9549 | 109 | 778.4661 |     |          |
| 20 | 3.1642  | 50 | 57.9834  | 80 | 265.5556 | 110 | 795.6396 |     |          |
| 21 | 3.6898  | 51 | 61.5607  | 81 | 277.5852 | 111 | 812.0847 |     |          |
| 22 | 4.2759  | 52 | 65.2695  | 82 | 290.0548 | 112 | 827.7756 |     |          |
| 23 | 4.9262  | 53 | 69.1187  | 83 | 302.9762 | 113 | 842.6959 |     |          |
| 24 | 5.6441  | 54 | 73.1187  | 84 | 316.3607 | 114 | 856.8376 |     |          |
| 25 | 6.4334  | 55 | 77.281   | 85 | 330.2202 | 115 | 870.2004 |     |          |
| 26 | 7.2974  | 56 | 81.6182  | 86 | 344.5663 | 116 | 882.791  |     |          |
| 27 | 8.2397  | 57 | 86.145   | 87 | 359.4111 | 117 | 894.6222 |     |          |
| 28 | 9.2634  | 58 | 90.8774  | 88 | 374.7666 | 118 | 905.7116 |     |          |
| 29 | 10.372  | 59 | 95.828   | 89 | 390.645  | 119 | 916.0815 |     |          |
| 30 | 11.5685 | 60 | 101.0047 | 90 | 407.0583 | 120 | 925.7571 |     |          |

---

901 *Author contributions.* ZS contributed the central idea. SC, ZS and  
902 HD conceived the method, developed the retrieval algorithm and  
903 discussed the results. SC analyzed the data, prepared the figures and  
904 wrote the paper. WG contributed to refining the ideas, carrying out  
905 additional analyses. All co-authors reviewed the paper.

906

907 *Competing interests.* The authors declare that they have no conflict  
908 of interest.

909

910 *Acknowledgements.* The study was supported by the National  
911 Natural Science Foundation of China (Grant no. 41875045). The  
912 study was also partly supported by the National Key Research

Program of China: Development of high-resolution data assimilation technology and atmospheric reanalysis data set in East Asia (Research on remote sensing telemetry data assimilation technology, Grant no. 2017YFC1501802).

## References

Aires, F., Schmitt, M., Chedin, A., and Scott, N.: The “weight smoothing” regularization of MLP for Jacobian stabilization, IEEE. T. Neural. Networks., 10, 1502-1510, <https://doi.org/10.1109/72.809096>, 1999.

Aires, F., Chédin, Alain., Scott, N. A., and Rossow, W. B.: A regularized neural net approach for retrieval of atmospheric and surface temperatures with the IASI instrument, J. Appl. Meteorol., 41,144-159, [https://doi.org/10.1175/1520-0450\(2002\)041<0144:ARNNAF>2.0.CO;2](https://doi.org/10.1175/1520-0450(2002)041<0144:ARNNAF>2.0.CO;2), 2002.

Aumann, H. H.: Atmospheric infrared sounder on the earth observing system, Optl. Engr., 33, 776-784, <https://doi.org/10.1117/12.159325>, 1994.

Aumann, H. H., Chahine, M. T., Gautier, C., and Goldberg, M.: AIRS/AMSU/HSB on the Aqua mission: design, science objective, data products, and processing systems, IEEE. Trans. GRS.,

935 41,253-264, <http://dx.doi.org/10.1109/TGRS.2002.808356>, 2003.

936 Chahine, M. I.: A general relaxation method for inverse solution of  
 937 the full radiative transfer equation, *J. Atmos. Sci.*, 29, 741-747,  
 938 [https://doi.org/10.1175/1520-0469\(1972\)029<0741:AGRMFI>2.0.](https://doi.org/10.1175/1520-0469(1972)029<0741:AGRMFI>2.0.CO;2)  
 939 CO;2, 1972.

940 Chang, K. W, L'Ecuyer, T. S., Kahn, B. H., and Natraj, V.:  
 941 Information content of visible and midinfrared radiances for  
 942 retrieving tropical ice cloud properties, *J. Geophys. Res.*, 122,  
 943 <https://doi.org/10.1002/2016JD026357>, 2017.

944 Chedin, A., Scott, N. A., Wahiche, C., and Moulinier, P.: The  
 945 improved initialization inversion method: a high resolution  
 946 physical method for temperature retrievals from satellites of the  
 947 tiros-n series, *J. Appl. Meteor.*, 24, 128-143,  
 948 [https://doi.org/10.1175/1520-0450\(1985\)024<0128:TIHIMA>2.0.C](https://doi.org/10.1175/1520-0450(1985)024<0128:TIHIMA>2.0.CO;2)  
 949 O;2, 1985.

950 Cyril, C., Alain, C., and Scott, N. A.: Airs channel selection for CO<sub>2</sub>  
 951 and other trace-gas retrievals, *Q. J. Roy. Meteor. Soc.*, 129,  
 952 2719-2740, <https://doi.org/10.1256/qj.02.180>, 2003.

953 Du, H. D., Huang, S. X., and Shi, H. Q.: Method and experiment of  
 954 channel selection for high spectral resolution data, *Acta. Physica.*  
 955 *Sinica.*, 57, 7685-7692, 2008 .

956 Eyre, J. R., Andersson E., and McNally, A. P.: Direct use of

satellite sounding radiances in numerical weather prediction, High Spectral Resolution Infrared Remote Sensing for Earth's Weather and Climate Studies, Springer, Berlin, Heidelberg, [https://doi.org/10.1007/978-3-642-84599-4\\_25](https://doi.org/10.1007/978-3-642-84599-4_25), 1993.

Fang, Z. Y.: The evolution of meteorological satellites and the insight from it, *Adv. Meteorol. Sci. Technol.*, 4, 27-34, <https://doi.org/10.3969/j.issn.2095-1973.2014.06.003>, 2014.

Gong, J., Wu, D. L., and Eckermann, S. D.: Gravity wave variances and propagation derived from AIRS radiances, *Atmos. Chem. Phys.*, 11, 11691-11738, <https://doi.org/10.5194/acp-12-1701-2012>, 2011.

He, M. Y., Du, H. D., Long, Z. Y., and Huang, S. X.: Selection of regularization parameters using an atmospheric retrievable index in a retrieval of atmospheric profile, *Acta. Physica Sinica.*, 61, 024205-160, 2012.

Hoffmann, L. and Alexander, M. J.: Retrieval of stratospheric temperatures from atmospheric infrared sounder radiance measurements for gravity wave studies, *J. Geophys. Res. Atm.*, 114, <https://doi.org/10.1029/2008JD011241>, 2009.

Huang, H. L., Li, J., Baggett, K., Smith, W. L., and Guan, L.: Evaluation of cloud-cleared radiances for numerical weather prediction and cloud-contaminated sounding applications,



979 Atmospheric and Environmental Remote Sensing Data Processing  
 980 and Utilization: Numerical Atmospheric Prediction and  
 981 Environmental Monitoring, I. S. O. Photonics.,  
 982 <https://doi.org/10.1117/12.613027>, 2005.

983 Kuai, L., Natraj, V., Shia, R. L., Miller, C., and Yung, Y. L.: Channel  
 984 selection using information content analysis: a case study of CO<sub>2</sub>  
 985 retrieval from near infrared measurements. J. Q. S. Radiative.  
 986 Transfer., 111, 1296-1304,  
 987 <https://doi.org/10.1016/j.jqsrt.2010.02.011>, 2010.

988 Li, J., Wolf, W. W., Menzel, W. P., Paul, Menzel. W., Zhang, W. J.,  
 989 Huang, H. L., and Achtor, T. H.: Global soundings of the  
 990 atmosphere from ATOVS measurements: the algorithm and  
 991 validation, J. Appl. Meteor., 39, 1248-1268,  
 992 [https://doi.org/10.1175/1520-0450\(2000\)039<1248:GSOTAF>2.0.](https://doi.org/10.1175/1520-0450(2000)039<1248:GSOTAF>2.0.CO;2)  
 993 CO;2, 2000.

994 Li, J., Liu, C. Y., Huang, H. L., Schmit, T. J., Wu, X., Menzel, W. P.,  
 995 and Gurka, J. J.: Optimal cloud-clearing for AIRS radiances using  
 996 MODIS, IEEE. Trans. GRS. , 43, 1266-1278, [http://dx.doi.org/](http://dx.doi.org/10.1109/tgrs.2005.847795)  
 997 10.1109/tgrs.2005.847795, 2005.

998 Liu, Z. Q.: A regional ATOVS radiance-bias correction scheme for  
 999 rediance assimilation, Acta. Meteorologica. Sinica., 65, 113-123,  
 1000 2007.

1001 Lupu, C., Gauthier, P., and Laroche, Stéphane.: Assessment of the  
 1002 impact of observations on analyses derived from observing system  
 1003 experiments, *Mon. Weather. Rev.*, 140, 245-257,  
 1004 <https://doi.org/10.1175/MWR-D-10-05010.1>, 2012.

1005 Menke, W.: *Geophysical Data Analysis: Discrete Inverse Theory*,  
 1006 Acad. Press., Columbia University, New York,  
 1007 <https://doi.org/10.1016/B978-0-12-397160-9.00019-9>, 1984.

1008 Prunet, P., Thépaut J. N., and Cass, V.: The information content of  
 1009 clear sky IASI radiances and their potential for numerical weather  
 1010 prediction, *Q. J. Roy. Meteor. Soc.*, 124, 211-241,  
 1011 <https://doi.org/10.1002/qj.49712454510>, 2010.

1012 Xu, Q.: Measuring information content from observations for data  
 1013 assimilation: relative entropy versus shannon entropy difference,  
 1014 *Tellus. A.*, 59, 198-209,  
 1015 <https://doi.org/10.1111/j.1600-0870.2006.00222.x>, 2007.

1016 Rabier, F., Fourrié, N., and Chafai, D.: Channel selection methods  
 1017 for infrared atmospheric sounding interferometer radiances, *Q. J.*  
 1018 *Roy. Meteor. Soc.*, 128, 1011-1027,  
 1019 <https://doi.org/10.1256/0035900021643638>, 2010.

1020 Richardson, M. and Stephens, G. L.: Information content of oco-2  
 1021 oxygen a-band channels for retrieving marine liquid cloud  
 1022 properties, *Atmospheric Measurement Techniques*, 11, 1-19,

<https://doi.org/10.5194/amt-11-1515-2018>, 2018.

Rodgers, C. D.: Information content and optimisation of high spectral resolution remote measurements, *Adv. Spa. Research*, 21, 136-147, [https://doi.org/10.1016/S0273-1177\(97\)00915-0](https://doi.org/10.1016/S0273-1177(97)00915-0), 1996.

Rodgers, C. D.: *Inverse Methods for Atmospheric Sounding*, Inverse methods for atmospheric sounding, World Scientific, <https://doi.org/10.1142/3171>, 2000.

Saunders, R., Hocking, J., Turner, E., Rayer, P., Rundle, D., Brunel, P., Vidot, J., Roquet, P., Matricardi, M., Geer, A., Bormann, N., and Lupu, C.: An update on the RTTOV fast radiative transfer model (currently at version 12), *Geosci. Model Dev.*, 11, 2717-2737, <https://doi.org/10.5194/gmd-11-2717-2018>, 2018.

Smith, W. L., Woolf, H. M., and Revercomb, H. E.: Linear simultaneous solution for temperature and absorbing constituent profiles from radiance spectra, *Appl. Optics.*, 30, 1117, <https://doi.org/10.1364/AO.30.001117>, 1991.

Wakita, H., Tokura, Y., Furukawa, F., and Takigawa, M.: Study of the information content contained in remote sensing data of atmosphere, *Acta. Physica. Sinica.*, 59, 683-691, 2010.

Wang, G., Lu, Q. F., Zhang, J. W., and Wang, H. Y.,.: Study on method and experiment of hyper-spectral atmospheric infrared sounder channel selection, *Remote Sensing Technology and*

1045       Application., 29, 795-802 , 2014.  
1046       Zhang, J. W., Wang, G., Zhang, H., Huang J., Chen J., and Wu, L. L.:  
1047       Experiment on hyper-spectral atmospheric infrared sounder  
1048       channel selection based on the cumulative effect coefficient of  
1049       principal component, Journal of Nanjing Institute of meteorology,  
1050       1, 36-42, <http://dx.doi.org/10.3969/j.issn.1674-7097.2011.01.005>,  
1051       2011.
